# Supplementary material for: Self-help friendliness and cooperation with self-help groups among rehabilitation clinics in Germany (KoReS): a mixed-methods study protocol
Source: PubMed Central journal article supplement — BMJ Open. 2024 Mar 20;14(3):e083489. doi: 10.1136/bmjopen-2023-083489 (PMC10961549; doi:10.1136/bmjopen-2023-083489), 2024-03-20
Supplement: bmjopen-2023-083489.draft_revisions.pdf [file bmjopen-2023-083489.draft_revisions.pdf]

# BMJ Open

BMJ Open is committed to open peer review. As part of this commitment we make the peer review history of every article we publish publicly available.

When an article is published we post the peer reviewers' comments and the authors' responses online. We also post the versions of the paper that were used during peer review. These are the versions that the peer review comments apply to.

The versions of the paper that follow are the versions that were submitted during the peer review process. They are not the versions of record or the final published versions. They should not be cited or distributed as the published version of this manuscript.

BMJ Open is an open access journal and the full, final, typeset and author-corrected version of record of the manuscript is available on our site with no access controls, subscription charges or pay-per-view fees (<http://bmjopen.bmj.com>).

If you have any questions on BMJ Open's open peer review process please email [info.bmjopen@bmj.com](mailto:info.bmjopen@bmj.com)

# BMJ Open

## Self-help friendliness and cooperation with self-help groups among rehabilitation clinics in Germany (KoReS): a mixed methods study protocol

|                               |                                                                                                                                                                                                                                                                                                                                                                                                                                                                                                                                                                                                                                              |
|-------------------------------|----------------------------------------------------------------------------------------------------------------------------------------------------------------------------------------------------------------------------------------------------------------------------------------------------------------------------------------------------------------------------------------------------------------------------------------------------------------------------------------------------------------------------------------------------------------------------------------------------------------------------------------------|
| Journal:                      | <i>BMJ Open</i>                                                                                                                                                                                                                                                                                                                                                                                                                                                                                                                                                                                                                              |
| Manuscript ID                 | bmjopen-2023-083489                                                                                                                                                                                                                                                                                                                                                                                                                                                                                                                                                                                                                          |
| Article Type:                 | Protocol                                                                                                                                                                                                                                                                                                                                                                                                                                                                                                                                                                                                                                     |
| Date Submitted by the Author: | 20-Dec-2023                                                                                                                                                                                                                                                                                                                                                                                                                                                                                                                                                                                                                                  |
| Complete List of Authors:     | Ziegler, Elâ; University Medical Center Hamburg-Eppendorf, Institute of Medical Sociology<br>Bartzsch, Thea; University Medical Center Hamburg-Eppendorf, Institute of Medical Sociology<br>Trojan, Alf; University Medical Center Hamburg-Eppendorf, Institute of Medical Sociology<br>Usko, Nicole; University Medical Center Hamburg-Eppendorf, Institute of Medical Sociology<br>Krahn, Ines; Network for Self-Help Friendliness and Patient Orientation in Health Care<br>Bütow, Sabine; German Working Group Self-Help Groups e.V.<br>Kofahl, Christopher; University Medical Center Hamburg-Eppendorf, Institute of Medical Sociology |
| Keywords:                     | Observational Study, REHABILITATION MEDICINE, Patient-Centered Care, Patient Participation, Health Services, Social Support                                                                                                                                                                                                                                                                                                                                                                                                                                                                                                                  |
|                               |                                                                                                                                                                                                                                                                                                                                                                                                                                                                                                                                                                                                                                              |

SCHOLARONE™  
Manuscripts

## Self-help friendliness and cooperation with self-help groups among rehabilitation clinics in Germany (KoReS): a mixed methods study protocol

Elâ Ziegler,<sup>1</sup> Thea Bartzsch,<sup>1</sup> Alf Trojan,<sup>1</sup> Nicole Usko,<sup>1</sup> Ines Krahn,<sup>2</sup> Sabine Bütow,<sup>3</sup> Christopher Kofahl<sup>1</sup>

<sup>1</sup>Institute of Medical Sociology, University Medical Center Hamburg-Eppendorf, Martinistraße 52, 20246 Hamburg, Germany

<sup>2</sup>Network for Self-Help Friendliness and Patient Orientation in Health Care, Scharfstraße 17, 14169 Berlin, Germany

<sup>3</sup>German Working Group Self-Help Groups e.V., Friedrichstrasse 28, 35392 Gießen, Germany

### Correspondence

Elâ Ziegler, University Medical Center Hamburg-Eppendorf, Institute of Medical Sociology, Martinistraße 52, 20246 Hamburg, Germany. E-mail: e.ziegler@uke.de (ORCID <https://orcid.org/0000-0002-2847-8087>)

### Keywords

*mixed methods, study protocol, rehabilitation, peer support, mutual aid, self-help groups, cooperation, patient orientation, comprehensive care, self-help friendliness*

### ABSTRACT

**Introduction:** Mutual aid in self-help groups is an important complement to medical rehabilitation for people with chronic diseases and disabilities. It contributes to stabilising rehabilitation success and further coping with disease and disability. Rehabilitation facilities play a central role in informing and referring patients to self-help groups. However, sustainable cooperation between rehabilitation and self-help, as can be achieved using the concept of self-help friendliness in health care, is rare, and data on the cooperation situation is lacking.

**Methods and analysis:** The KoReS study will examine self-help friendliness and cooperation between rehabilitation clinics and self-help associations in Germany, applying a sequential exploratory mixed methods design. In the first qualitative phase, problem-centred interviews and focus groups are conducted with representatives of self-help-friendly rehabilitation clinics, members of their cooperating self-help groups and staff of the self-help clearinghouses involved based on a purposeful sampling strategy. The qualitative data collected will be analysed through content analysis utilising MAXQDA. The findings will serve for the development of a questionnaire for a quantitative second phase. In cross-sectional studies, staff responsible for self-help in all rehabilitation clinics nationwide, representatives of self-help groups and -organisations of the core indications, as well as staff of self-help clearinghouses will be surveyed online. Quantitative data analysis with SPSS will include uni-, bi- and multivariate analyses. In addition, a content analysis of rehabilitation clinics' websites will evaluate the visibility of self-help in their public relations.

**Ethics and dissemination:** The UKE Ethics Committee granted ethical approval. For results dissemination, various formats such as workshops, presentations, homepages and publications for the international scientific community, rehabilitation centres, self-help organisations and the general public in Germany will be used. For relevant stakeholders, practical guides and recommendations for

1  
2  
3 action to implement self-help friendliness will derive from the results to strengthen patient orientation  
4 and cooperation between rehabilitation and self-help to promote the sustainability of rehabilitation  
5 processes.  
6

## 7 **STRENGTHS AND LIMITATIONS OF THIS STUDY**

- 9 • The mixed-method design allows for a comprehensive analysis of the cooperation situation  
10 between rehabilitation and self-help by combining the qualitative data on in-depth insights from  
11 experts in the field with quantitative survey data to quantify the extent of cooperation and its  
12 framework conditions (triangulation)
- 13 • This study is a multicentre, multiperspective investigation across Germany
- 14 • A panel of experts from the fields of self-help, rehabilitation, patient-oriented research and public  
15 health accompanies the study
- 16 • There is potential for a self-selection bias among rehabilitation centres and self-help organisations  
17 participating in the surveys
- 18 • Patients of the rehabilitation clinics are not participating in the surveys, as the study is conducted  
19 at an organisational level, focusing on institutional collaboration  
20  
21  
22  
23  
24

## 25 **MAIN TEXT**

### 26 **INTRODUCTION**

27  
28  
29 People with chronic diseases and disabilities face considerable needs for adjustments to cope with  
30 their illness and self-management to master everyday life with as few restrictions in their quality of life  
31 as possible.<sup>1</sup> To achieve these aims, several offers of medical rehabilitation and reintegration exist<sup>2</sup> for  
32 the more than 1 million annual applicants for medical rehabilitation in Germany.<sup>3</sup> The majority of  
33 medical rehabilitation throughout Germany is provided on an inpatient basis. Orthopaedic and  
34 rheumatic diseases are the most common rehabilitation indication areas, which account for more than  
35 a third of inpatient rehabilitation services,<sup>3</sup> along other prevalent indications such as cancer, addiction,  
36 psychosomatic disorders, injuries, or neurological diseases. However, rehabilitation measures usually  
37 cannot cover the entire scope of topics and issues relevant to the everyday lives of rehabilitants due  
38 to illness or disability.<sup>4</sup>  
39  
40

41  
42 To close this gap, collective self-help, also known as peer support, offers an important supplement to  
43 medical rehabilitation. Self-help comprises self-help groups (SHG), self-help organisations (SHO) and  
44 self-help clearinghouses (SHC). It contributes to coping with the disease and stabilising the success of  
45 rehabilitation.<sup>5,6</sup> The authentic knowledge and expertise from the shared experiences of other similarly  
46 affected patients and their relatives<sup>7</sup> form a 'solidarity-based mutual aid'.<sup>8</sup> Self-help in Germany is  
47 provided by estimated 100,000 SHG and more than 1,000 SHO at national and federal levels.<sup>9</sup> They are  
48 supported by a professional self-help system consisting of more than 300 SHC, which operate in  
49 regional networks in social and health care and maintain additional branch offices providing  
50 professional support services across Germany.<sup>9</sup> The positive effects of health-related self-help are  
51 manifold and have been demonstrated in numerous studies. Predominantly, they relate to health and  
52 psychosocial outcomes, as self-help provides psychosocial and emotional relief, for instance.<sup>10,11</sup>  
53 Moreover, self-help has been shown to foster empowerment<sup>12,13</sup> and health literacy,<sup>14</sup> i.e. health-  
54 related knowledge,<sup>12,15</sup> self-management and self-efficacy<sup>13,16,17</sup> of people with health related or social  
55 problems. It can further alleviate disease-related symptoms and promote healing processes through  
56 developing and maintaining healthy behaviours.<sup>18,19</sup>  
57  
58  
59  
60

1  
2  
3 In order to participate in self-help activities, knowledge about self-help and referral to SHG is essential.  
4 Rehabilitation facilities are of central importance to enable this by providing information about self-  
5 help to their patients.<sup>20</sup> After diagnosis and acute treatment, the phase of rehabilitation is an  
6 appropriate time to draw attention to self-help, as it marks a time of convalescence in which patients  
7 recover physically and emotionally, and address the coping needs that now arise.<sup>21</sup> As rehabilitation  
8 usually lasts several weeks, it opens up further possibilities to systematically inform about the various  
9 options for coping with the disease or disability and stabilising the success of rehabilitation in the long  
10 term. Thus, it represents the 'initial spark',<sup>21 (p.131)</sup> especially as the rehabilitation goals are generally  
11 not completed in the rehabilitation service itself.<sup>22,23</sup>

14 A prerequisite for successful information and referral to self-help from rehabilitation facilities is  
15 reliable and sustainable cooperation. To achieve this, efforts have been made over the last two  
16 decades [24] and have led to some positive developments.<sup>25-27</sup> One measure of particular relevance is  
17 the concept of self-help friendliness (SHF) in health care and its quality criteria to establish and  
18 maintain systematic cooperation.<sup>26,28,29</sup> It was initiated in 2004 within a consensus process of  
19 stakeholders in the German self-help system and representatives of various health care institutions to  
20 develop, evaluate and implement quality criteria for systematic, reliable and sustainable collaboration  
21 between health care institutions and patient groups.<sup>26,28,29</sup> The SHF concept describes how cooperation  
22 between SHG, SHC and healthcare facilities can be structured, systematically designed and  
23 permanently implemented in practice.<sup>26</sup> Verifiable quality criteria were developed to assess the  
24 implementation and degree of SHF in healthcare facilities.<sup>26</sup> Some of these indicators of SHF have been  
25 implemented in quality management systems in healthcare facilities, however not sufficiently.<sup>30</sup>  
26 Consequently, to systematically promote, implement and disseminate the SHF concept, the  
27 nationwide network 'Self-Help Friendliness and Patient Orientation in Health Care' (SPiG) was founded  
28 in 2009.<sup>30,31</sup> The SPiG network consists of over 450 active members, including 40 rehabilitation clinics.  
29 It awards healthcare facilities that have successfully implemented the SHF quality criteria with the Self-  
30 help Friendliness quality seal, which is valid for three years. To date, 19 rehabilitation clinics and 28  
31 hospitals have been awarded this quality seal, in some cases up to five times.<sup>31</sup>

34 Yet, despite these developments and increased positive attitudes of rehabilitation facilities towards  
35 self-help,<sup>27</sup> the concept is not widely used. Overall cooperation, including information about self-help  
36 and referral to SHG in the rehabilitation process, remains low.<sup>32-34</sup> Currently, there is a lack of data on  
37 the frequency, design and extent of cooperation between German self-help and rehabilitation  
38 facilities. Furthermore, it seems necessary to identify framework conditions and factors that facilitate  
39 and hinder cooperation in this context. Recommendations for action, such as guidelines, can then be  
40 derived from this, also to be considered for modifying existing QM systems.

### 46 **Study aims and objectives**

48 Against this backdrop, the joint project of the Institute for Medical Sociology (IMS) at the University  
49 Medical Center Hamburg-Eppendorf (UKE) and the SPiG network investigates the cooperation  
50 between rehabilitation clinics and self-help nationwide. The project funded by the German Pension  
51 Insurance Federation examines the framework conditions and factors that aid or hinder this  
52 cooperation, with particular focus on the concept of SHF and its quality criteria. The aim is to anchor  
53 the cooperation between rehabilitation clinics and SHO and SHG more firmly in a patient-oriented  
54 manner to ensure the sustainability of rehabilitation measures through recommendations for action  
55 and implementation of SHF and its corresponding quality criteria.

58 The first subproject of the study explores the status and development potential of SHF at the member  
59 rehabilitation clinics of the SPiG network. Subproject two focuses on frequency, intensity and models  
60

of good practice regarding cooperation with self-help in rehabilitation clinics overall. The following questions are to be answered as part of the two subprojects:

#### Subproject 1

1. Which experience-based factors and preconditions contribute to self-help-friendly cooperation between rehabilitation clinics and self-help, what are possible obstacles?
2. From the perspective of rehabilitation clinics and self-help, how well can the SHF criteria be implemented in rehabilitation clinics, and how can cooperation with self-help be systematised and maintained?
3. What has been the experience of staff of SHC involved in cooperation to implement SHF in rehabilitation clinics?

#### Subproject 2

1. To what extent do cooperations between SHG and rehabilitation clinics exist, how can they be described, and which models can be distinguished?
2. Which facilitating and hindering factors for good cooperation are reported?
3. How disposed are rehabilitation clinics to implement measures for a systematic cooperation with SHG, or specifically to implement the concept of SHF, and how can this be increased?
4. What are the needs for adjustments in the QM systems relevant to rehabilitation clinics?

## METHODS

### Study design

The KoReS study follows an exploratory sequential mixed methods design, including qualitative and quantitative research consecutively.<sup>35,36</sup> It consists of two study subprojects, with a total of ten core research steps and three workshops (see Figure 1). The project is scheduled to run from August 2023 (beginning with the planning phase) to December 2025 (concluding with the writing of guides and reports), with preliminary qualitative data collection commencing in November 2023 and survey data collection starting in July 2024.

#### [Figure 1 Research flow

*Abbreviations: WS Workshop, SHG Self-Help Groups, SHO Self-Help Organisations, SHC Self-Help Clearinghouses]*

### Patient and public involvement

Patient and public involvement is an integral part of both subprojects. Representatives of self-help associations are part of the project team. In addition, a scientific advisory board and a consortium of relevant umbrella organisations accompany the study process. The scientific advisory board consists of patient representatives and experts from the fields of self-help, rehabilitation, chronic care, patient-oriented research and public health in Germany, Austria and Switzerland. Supporting organisations consist of federal working groups for self-help and rehabilitation, welfare associations, QM representatives of rehabilitation clinics, spokespersons of SHG, representatives of SHO, members of the SPiG network, and staff of SHC. They are and will be involved in the project conceptualisation, instrument development, revision of interview guides and questionnaires and overall project realisation, aiding in public relations work and recruitment of study participants. The mentioned

1  
2  
3 stakeholders will advise on the research process and procedures as well as the interpretation of the  
4 results, contributing to how the outcomes can be used in practice, in line with the participation stages  
5 in health research.<sup>37</sup> Moreover, the perspectives and insights of patient representatives obtained  
6 through the qualitative interviews will directly be incorporated into this study for the quantitative  
7 phase. Three workshops will be held with all stakeholders at the beginning, middle and end of the  
8 project to foster the collaboration and dissemination of results.  
9

## 10 Qualitative research

11  
12 The qualitative research phase marks the beginning of subproject 1 to explore the cooperation status  
13 and potential between 8 out of the 40 rehabilitation clinics that are members of the SPiG network and  
14 corresponding self-help facilities through in-depth interviews and focus groups.  
15  
16

### 17 *Sample and data collection*

18  
19 Semi-structured guideline-based interviews and focus groups with 8-16 representatives of 8 self-help  
20 friendly rehabilitation clinics, 8-24 members of cooperating SHG and 6-8 employees of the regional  
21 self-help clearinghouses will be conducted by the researchers based on a purposeful sampling.<sup>38</sup>  
22 Sampling criteria are different indication groups (cancer, neurological, orthopaedic, psychosomatic  
23 diseases, rheumatism and addiction), experience and membership duration in the network (quality  
24 seal award status), and the regional distribution of the rehabilitation clinics across different federal  
25 states. Participants from the rehabilitation clinics are employees responsible for cooperation with self-  
26 help (QM officers, social services and (other) contact persons for self-help). In addition, the  
27 experiences of the cooperating SHG or SHO and the employees of SHC responsible for SHF will be  
28 surveyed. If more than three protagonists from the self-help associations are involved in the  
29 cooperation with the respective rehabilitation clinic, focus groups will be conducted instead of  
30 individual interviews. The interview partners are recruited via gatekeeper access through the SPiG  
31 network by phone and e-mail, passing on the project description and interview topics with the  
32 participation request.  
33  
34  
35

36 After participants' consent, the interviews and optional focus groups will be conducted via online video  
37 systems or, alternatively, by phone. The interviews will be audio-recorded and supplemented by  
38 handwritten transcripts. Volunteer spokespersons and leaders of SHG will receive an incentive of 30€  
39 for their participation. The guidelines for the semi-structured expert interviews are developed using  
40 the SPSS method (collect, check, sort and subsume)<sup>39</sup> in consultation with all cooperation partners and  
41 the scientific advisory board. The interview topics were specified with the participants in the first  
42 workshop. They contain introductory questions, open narrative prompts, questions to maintain the  
43 conversation and concrete follow-up questions on four core topics (see supplement for exemplary  
44 guide): origin and development of the cooperation, cooperation design and organisation, evaluation  
45 and assessment of the cooperation, as well as cooperation needs.  
46  
47  
48

49 The interview aim is to trace the processes in the development of cooperation and to identify the  
50 favourable and obstructive factors along the way. In addition, it will be investigated whether, how and  
51 under what conditions cooperation with self-help (and, if applicable, compliance with the SHF criteria)  
52 is implemented and actually practised. In particular, motives, expectations, needs and experiences of  
53 both rehabilitation clinics and self-help associations will be focussed on.  
54  
55

### 56 *Data analysis*

57  
58 The audio recordings of the interviews and focus groups will be anonymised and transcribed by student  
59 assistants using the transcription programme F4, following the recommendations of Kuckartz,<sup>40</sup>  
60 Dresing and Pehl.<sup>41</sup> Transcripts will be considered in full for data analysis and coded deductively

1  
2  
3 (according to the topics of the guideline) and inductively (from the transcripts), computer-assisted with  
4 the MAXQDA software. Coding units each consist of a complete sentence, and in vivo codes will be  
5 used for naming codes. The qualitative data analysis will be carried out using thematic<sup>42</sup> and content  
6 analysis.<sup>40</sup> The results form the basis for developing a questionnaire to survey the cooperation between  
7 rehabilitation clinics, SHG/SHO and SHC. Furthermore, the results should aid improving the SHF  
8 concept to implement measures that support cooperation more effectively in other rehabilitation  
9 clinics.  
10  
11

## 12 Quantitative research

13  
14 In the second subproject, three nationwide cross-sectional online surveys will be deployed as part of  
15 the quantitative research to examine frequency, intensity and models of cooperation among SHG and  
16 SHO, SHC and all rehabilitation clinics in Germany.  
17

### 18 *Sample and data collection*

19  
20 Based on the preliminary qualitative study and already existing scales about SHF, a questionnaire will  
21 be developed and piloted with the QM officers and social services of the above mentioned 40 member  
22 clinics of the SPiG network and additional 20 non-member rehabilitation clinics. The questionnaire will  
23 be finalised in the second workshop. It will be used for the online survey of QM officers and social  
24 services of all the approximately 1700 inpatient, partially inpatient and outpatient rehabilitation clinics  
25 in Germany listed in the current database of Vidal MMI Germany GmbH<sup>43</sup> and approximately 600  
26 representatives of the SHG and SHO corresponding to the main indications of the rehabilitation clinics.  
27 Based on previous studies, we expect at least 100 SHG and 20 SHO of each of the five core indications  
28 to participate. The estimated response rate of 20-30% regarding clinic participation draws on previous  
29 studies but is also depending on the relevant contact person in the clinics.<sup>44-46</sup> In parallel to the clinic  
30 survey, staff of the 105 SHC who are members of the SPiG network will be surveyed online about their  
31 experiences with SHF, with an estimated participation rate of 80%. The questionnaire to be developed  
32 for this purpose will adapt questions from the questionnaire for the rehabilitation clinics to the  
33 perspective of self-help facilities. Letters of recommendation from the relevant umbrella organisations  
34 and cooperation partners are attached to the participation call via post and e-mail, and the project will  
35 be advertised via various channels as described above to increase participation rates. Rehabilitation  
36 clinics that have not participated within two months will be sent a reminder.  
37  
38  
39  
40

41 The online surveys are conducted with Lime Survey to ensure data collection in compliance with data  
42 protection regulations. Participants receive an access link to the respective online questionnaire, study  
43 information and a consent and data protection declaration. After clicking on the consent button, the  
44 online questionnaire opens. Only cookies that allow the survey to continue are permitted. No IP  
45 addresses or personal data of the participants will be collected. Participation is voluntary and based  
46 on the professional function. Names and location details will be anonymised before analysis and  
47 publications. The surveys contain predominantly closed questions and free text fields on the four core  
48 topics of cooperation described above, and questions about the characteristics of the facilities. An  
49 adapted version<sup>47</sup> of the psychometrically tested and validated SelP-K questionnaire for measuring  
50 self-help and patient orientation in hospitals<sup>48</sup> will be used to assess the implementation and degree  
51 of SHF.  
52  
53  
54

### 55 *Data analysis*

56  
57 The online survey software provides the survey data in downloadable database formats. Manual data  
58 entry is thus not needed. Student assistants will perform post-coding, categorisation, and  
59 anonymisation for free text responses. Research assistants will use syntax to perform variable  
60 encoding, scale and index building, and imputations. Univariate descriptive statistics (distributions,



1  
2  
3 means, mode, median, SD, analysis of variance), bivariate analyses (correlation, t-test, Chi<sup>2</sup>-test) and  
4 possibly multivariate statistics (logistic and linear regression) will be executed using IBM SPSS Statistics  
5 27 or higher to compare subgroups by structural characteristics of the facilities and to identify  
6 associations for high or low levels of cooperation and SHF implementation. Statistical significance will  
7 be set at an alpha level of 0.05 for all analyses.  
8  
9

#### 10 Website content analysis

11 In addition, a website content analysis of a random sample of one-fourth of all rehabilitation clinics (N  
12 ≈ 425), stratified by indications, will be conducted. Inclusion criteria are rehabilitation clinics in  
13 Germany with relevant indications and a corresponding available homepage. The websites will be  
14 screened for self-help references to quantify and evaluate the relevance of self-help in the public  
15 relations work of the facilities. For this purpose, a codebook with criteria for categorising self-help  
16 visibility will be developed to code the sample of webpages retrieved via Google. Relevant criteria  
17 include whether the website contains the word or synonyms of self-help, whether references to SHC,  
18 SHG and SHO are present, whether contact persons for self-help or a representative are available and  
19 if links to webpages of self-help exist, among others. The websites will be coded accordingly in SPSS or  
20 Excel concerning the fulfilment of the criteria, and an aggregated SHF-Index will be built to rate the  
21 visibility of self-help. Data analysis will comprise frequency counts and calculating means. A student  
22 assistant will conduct the analysis with guidance and support from a senior researcher.  
23  
24  
25  
26

#### 27 *Data triangulation*

28 Both qualitative and quantitative data obtained from this project are considered as offering  
29 complementary information<sup>49</sup> on the subject of cooperation between rehabilitation and self-help  
30 facilities. The data will be collected sequentially and analysed separately in the initial stage. Thus, the  
31 first phase of qualitative data collection and analysis serves to explore cooperation between self-help  
32 and rehabilitation facilities from the perspectives and experiences of their responsible staff. These  
33 findings will inform the subsequent quantitative phase to develop an instrument for the quantitative  
34 survey of self-help and rehabilitation representatives. The process of integrating findings from the  
35 mixed methods will also take place at the interpretation stage after all data has been collected and  
36 analysed separately through triangulation<sup>49</sup> to gain a more comprehensive understanding of the  
37 facilitating and hindering factors, developments and needs concerning cooperation using these two  
38 different approaches.  
39  
40  
41  
42  
43  
44

## 45 **ETHICS AND DISSEMINATION**

### 46 **Ethical considerations**

47  
48 Ethical approval for the study was granted by the Local Psychological Ethics Committee at the Centre  
49 for Psychosocial Medicine of the University Medical Centre Hamburg-Eppendorf (reference number  
50 LPEK-0648). A data protection concept was developed for the project to ensure adherence to relevant  
51 national and international data protection regulations for all data. It has been reviewed and approved  
52 by the data protection officers of the German Pension Insurance Federation. As part of the research  
53 project, only personal data relating to the respective institution, the job title of the respondents and  
54 their function in the rehabilitation institutions or self-help associations is collected. No specific  
55 personal data containing private information of the participants is collected. The personal data  
56 provided will be anonymised for analyses. Scientific publications will also only be made in anonymised  
57 form, unless the participants explicitly request to be named, for instance with regard to examples of  
58 good practice. Confidentiality will be maintained at all levels of data management and research data  
59  
60

will be processed in accordance with applicable data protection regulations. Study data will be stored password-protected at the IMS for ten years and is only accessible to the research team. In accordance with national requirements and the principles of the Declaration of Helsinki, informed consent will be obtained from all participants prior to participation in the study. It contains information on the study objectives, scientific significance, duration, possible remuneration, the voluntary and anonymous nature of participation, information on data protection and the possibility to withdraw or terminate participation in the study at any time without adverse consequences. There are no specific risks for the participants. Participants have a contact person and only adults capable of giving consent can participate. The qualitative interviews and additional focus groups will be conducted solely by trained researchers, and interview guides and questionnaires will be pre-tested to minimise any possible psychological burden for the participants. The study has been (pre-)registered at Open Science Framework (OSF) (registration DOI <https://doi.org/10.17605/OSF.IO/R9UQK>).

### Dissemination plan

Several dissemination channels will be considered, addressing the scientific community as well as rehabilitation stakeholders, self-help organisations, and the general public in Germany. Project progress and results will be presented and developed in participatory workshops and national conferences, and further reporting culture will be promoted through the project homepage, created for visibility and dissemination. In addition, the SPiG network and the supporting organisations will provide up-to-date information about the project progress on their homepages, newsletters and events. Publications in scientific peer-reviewed journals are planned for the international scientific community. Practical aids and recommendations for action to implement self-help friendliness for the relevant actors will derive from the results to systematically establish cooperation between self-help representatives and rehabilitation clinics, provide people with chronic illnesses and disabilities with self-help services, stabilise rehabilitation successes and foster coping and self-management. A final report on the results will also be prepared for the funder.

### REFERENCES

1. Grady PA, Gough LL. Self-management: a comprehensive approach to management of chronic conditions. *Am J Public Health*. 2014;104(8):e25-e31.
2. Gerdes N, Zwingmann C, Jäckel WH. The system of rehabilitation in Germany. In: Jäckel WH, Bengel J, Herdt J, eds. *Research in Rehabilitation. Results from a research network in Southwest Germany*. Schattauer; 2006:3-19.
3. Deutsche Rentenversicherung Bund. Reha-Bericht 2022. Available online: [https://www.deutsche-rentenversicherung.de/SharedDocs/Downloads/DE/Statistiken-und-Berichte/Berichte/rehabericht\\_2022.html](https://www.deutsche-rentenversicherung.de/SharedDocs/Downloads/DE/Statistiken-und-Berichte/Berichte/rehabericht_2022.html) (accessed 12 August 2023).
4. Werner S, Nickel S, Kofahl C. Was Zahlen nicht erfassen und ausdrücken können - Gegenseitige Unterstützung unter MS-Betroffenen - Ergebnisse aus dem SHILD-Projekt. In: Deutsche Arbeitsgemeinschaft Selbsthilfegruppen e.V. (DAG SHG), ed. *Selbsthilfegruppenjahrbuch 2018*. Gießen, DAG SHG, 2018:113-123. Available online: <https://www.dag-shg.de/data/Fachpublikationen/2018/DAGSHG-Jahrbuch-2018-Werner-et-al.pdf> (accessed 14 August 2023).
5. Deutsche Rentenversicherung Bund. Selbsthilfegruppen und Verbände. [https://www.deutsche-rentenversicherung.de/DRV/DE/Reha/Was-ist-wenn/selbsthilfegruppen\\_verbaende.html](https://www.deutsche-rentenversicherung.de/DRV/DE/Reha/Was-ist-wenn/selbsthilfegruppen_verbaende.html) (accessed 7 August 2023).
6. Bundesarbeitsgemeinschaft für Rehabilitation. Gemeinsame Empfehlungen zu Förderung der Selbsthilfe. BAG, 2012. <https://www.bag->

- [selbsthilfe.de/fileadmin/user\\_upload/Informationen\\_fuer\\_SELBSTHILFE-AKTIVE/Selbsthilfefoerderung/Andere/BAR\\_Gemeinsame\\_Empfehlung\\_zu\\_Foerderung\\_der\\_Selbsthilfe.pdf](https://selbsthilfe.de/fileadmin/user_upload/Informationen_fuer_SELBSTHILFE-AKTIVE/Selbsthilfefoerderung/Andere/BAR_Gemeinsame_Empfehlung_zu_Foerderung_der_Selbsthilfe.pdf) (accessed 14 August 2023).
7. Kofahl C, Trojan A. Die Patientin und der Patient im Versorgungsgeschehen: Gesundheitsselbsthilfe und Laienpotenzial. In: Schwartz FW, Walter U, Siegrist J, Kolip P, Leidl R, Busse R, Amelung V, Dierks ML, eds. Public Health: Gesundheit und Gesundheitswesen. Elsevier;2022:481-489.
  8. Schulz-Nieswandt F, Langenhorst F. Gesundheitsbezogene Selbsthilfe in Deutschland. Zu Genealogie, Gestalt, Gestaltwandel und Wirkkreisen solidarischer gegenseitigkeitshilfegruppen und der Selbsthilfeorganisationen. Berlin, Duncker & Humblot;2015.
  9. Nationale Kontakt- und Informationsstelle zur Anregung und Unterstützung von Selbsthilfegruppen (NAKOS). NAKOS Studien. Selbsthilfe Im Überblick 6. Berlin, Germany: NAKOS, 2020:1-60. Available online: <https://www.nakos.de/data/Fachpublikationen/2020/NAKOS-Studien-06-2019.pdf> (accessed 2 August 2023).
  10. Kofahl C, Haack M, Nickel S, Dierks ML. Wirkungen der gemeinschaftlichen Selbsthilfe. LIT-Verlag; 2019. Available online: [https://www.uke.de/extern/shild/Materialien\\_Dateien/Kofahl\\_Haack\\_Nickel\\_Dierks\\_2019\\_SHIL\\_D\\_Wirkungen\\_Selbsthilfe\\_digital](https://www.uke.de/extern/shild/Materialien_Dateien/Kofahl_Haack_Nickel_Dierks_2019_SHIL_D_Wirkungen_Selbsthilfe_digital) (accessed 14 August 2023).
  11. Ho FY, Chan CS, Lo WY, Leung JC. The effect of self-help cognitive behavioral therapy for insomnia on depressive symptoms: An updated meta-analysis of randomized controlled trials. *J Affect Disord.* 2020;265:287-304.
  12. Ziegler E, Hill J, Lieske B, Klein J, dem OV Knesebeck, Kofahl C. Empowerment in cancer patients: Does peer support make a difference? A systematic review. *Psychooncology.* 2022;31(5):683-704.
  13. Burke E, Pyle M, Machin K, Varese F, Morrison AP. The effects of peer support on empowerment, self-efficacy, and internalized stigma: A narrative synthesis and meta-analysis. *Stigma Health.* 2019;4(3):337-356.
  14. Kofahl C. Gemeinschaftliche Selbsthilfe und Gesundheitskompetenz - der Beitrag der Selbsthilfe zur Gesundheitsbildung des Einzelnen und der Bevölkerung. In: Rathmann K, Dadaczynski K, Okan O, Messer M, eds. Gesundheitskompetenz. Springer;2022:1-12.
  15. Kofahl C. Associations of collective self-help activity, health literacy and quality of life in patients with tinnitus. *Patient Educ Couns.* 2018;101(12):2170-2178.
  16. Nickel S, Haack M, von dem Knesebeck O, Dierks ML, Seidel G, Werner S, et al. Teilnahme an Selbsthilfegruppen: Wirkungen auf Selbstmanagement und Wissenserwerb. *Bundesgesundheitsbl.* 2019;62(1):10-16.
  17. Liang D, Jia R, Zhou X, et al. The effectiveness of peer support on self-efficacy and self-management in people with type 2 diabetes: A meta-analysis. *Patient Educ Couns.* 2021;104(4):760-769.
  18. Bottlender M, Soyka M. Prädiktion des Behandlungserfolges 24 Monate nach ambulanter Alkoholentwöhnungstherapie: Die Bedeutung von Selbsthilfegruppen. *Fortschr Neurol Psychiatr.* 2005;73(3):150-155.
  19. Azmiardi A, Murti B, Febrinasari RP, Tamtomo DG. The effect of peer support in diabetes self-management education on glycemic control in patients with type 2 diabetes: a systematic review and meta-analysis. *Epidemiol Health.* 2021;43:e2021090.
  20. Klein M, Borgetto B. Kooperation und Vernetzung von Rehabilitationseinrichtungen und Selbsthilfeinitiativen: Ergebnisse einer Befragung deutscher Rehabilitationseinrichtungen. *DRV-Schriften.* 2003:41-42.
  21. Lindow B, Naumann B, Klosterhuis H. Kontinuität der rehabilitativen Versorgung - Selbsthilfe und Nachsorge nach medizinischer Rehabilitation der Rentenversicherung. In: Deutsche Arbeitsgemeinschaft Selbsthilfegruppen e.V. (DAG SHG), ed. Selbsthilfegruppenjahrbuch 2011. Gießen, DAG SHG, 2011:120-133. Available online: <https://www.dag->

- 1  
2  
3 [shg.de/data/Fachpublikationen/2011/DAGSHG-Jahrbuch-11-Lindow.pdf](https://shg.de/data/Fachpublikationen/2011/DAGSHG-Jahrbuch-11-Lindow.pdf) (accessed 14 August  
4 2023).
- 5  
6 22. Gerdes N, Bührlen B, Lichtenberg S, Jäckel WH. Rehabilitationsnachsorge – Analyse der  
7 Nachsorgeempfehlungen und ihrer Umsetzung. Roderer; 2005.
- 8  
9 23. Köpke KH. Erfolgreiche Rehabilitation braucht Nachsorge. Auf gutem Wege und dennoch großer  
10 Handlungsbedarf. In: Weber A, eds. Gesundheit – Arbeit – Rehabilitation. Festschrift für Wolfgang  
11 Slesina. Regensburg: Roderer; 2008:71- 90.
- 12  
13 24. Bundesarbeitsgemeinschaft Selbsthilfe von Menschen mit Behinderung, chronischer Erkrankung  
14 und ihren Angehörigen e. V. Handlungsleitfaden für die gesundheitliche Selbsthilfe zur Mitwirkung  
15 von Betroffenen im Rahmen der medizinischen Rehabilitation. BAG, 2015. [https://www.bag-  
16 selbsthilfe.de/informationen-fuer-selbsthilfe-aktive/die-projekte-der-bag-  
17 selbsthilfe/handlungsleitfaden-fuer-die-gesundheitliche-selbsthilfe-zur-mitwirkung-von-  
18 betroffenen-im-rahmen-der-medizinischen-rehabilitation](https://www.bag-selbsthilfe.de/informationen-fuer-selbsthilfe-aktive/die-projekte-der-bag-selbsthilfe/handlungsleitfaden-fuer-die-gesundheitliche-selbsthilfe-zur-mitwirkung-von-betroffenen-im-rahmen-der-medizinischen-rehabilitation) (accessed 14 August 2023).
- 19  
20 25. Nationale Kontakt- und Informationsstelle zur Anregung und Unterstützung von  
21 Selbsthilfegruppen (NAKOS). NAKOS-EXTRA 34. Kooperation von Selbsthilfekontaktstellen und  
22 Rehabilitationskliniken. Berlin; 2003:1-79.
- 23  
24 26. Trojan A, Bellwinkel M, Bobzien M, Nickel S. Selbsthilfefreundlichkeit Im Gesundheitswesen Wie  
25 Sich Selbsthilfebezogene Patientenorientierung Systematisch Entwickeln Und Verankern Lässt.  
26 Bremerhaven Wirtschaftsverl. Nw, Verl. Für Neue Wiss; 2012.
- 27  
28 27. Haenel J, Wittmar S, Wuensche I, Borgetto B. Deutschlandweite Befragung zur Vernetzung und  
29 Kooperation von Rehabilitation und Selbsthilfe (VERS 2.0): Ein Überblick über Meinungen,  
30 Kontakte und Kooperationen von Rehabilitationseinrichtungen in Bezug auf Selbsthilfe.  
31 Rehabilitation. 2023;62:13-21.
- 32  
33 28. Kofahl C, Trojan A, von dem Knesebeck O, Nickel S. Self-help friendliness: A German approach for  
34 strengthening the cooperation between self-help groups and health care professionals. Soc Sci  
35 Med. 2014;123:217-225.
- 36  
37 29. Nickel S, Trojan A, Kofahl C. Involving self-help groups in health-care institutions: the patients'  
38 contribution to and their view of "self-help friendliness" as an approach to implement quality  
39 criteria of sustainable co-operation. Health Expect. 2017;20(2):274-287.
- 40  
41 30. Nationale Kontakt- und Informationsstelle zur Anregung und Unterstützung von  
42 Selbsthilfegruppen (NAKOS). NAKOS-EXTRA 39. Integration von Selbsthilfefreundlichkeit als  
43 Qualitätsmerkmal in Qualitätsmanagement-Systemen und -strukturen im Gesundheitswesen.  
44 Berlin; 2018:6-123.
- 45  
46 31. Selbsthilfefreundlichkeit und Patientenorientierung im Gesundheitswesen.  
47 <https://www.selbsthilfefreundlichkeit.de/uber-uns/> (accessed 2 August 2023).
- 48  
49 32. Trojan A. Selbsthilfegruppen als Akteure für mehr Kooperation und Integration. In: Brandhorst A,  
50 Hildebrandt H, Luthe EW, eds. Kooperation und Integration. Das unvollendete Projekt des  
51 Gesundheitswesens. Springer; 2017:167-189.
- 52  
53 33. Bobzien M, Trojan A. „Selbsthilfefreundlichkeit“ als Element patientenorientierter Rehabilitation  
54 – Ergebnisse eines Modellversuchs. Rehabilitation. 2015;54:116-122.
- 55  
56 34. Bundesarbeitsgemeinschaft Selbsthilfe von Menschen mit Behinderung, chronischer Erkrankung  
57 und ihren Angehörigen e.V. Strategiepapier: Selbsthilfe und Rehabilitation. BAG, 2018.  
58 [https://www.bag-selbsthilfe-  
59 aktive/projekte/SH\\_der\\_Zukunft/Strategiepapier\\_Selbsthilfe\\_und\\_Rehabilitation.docx](https://www.bag-selbsthilfe.de/informationen-fuer-selbsthilfe-aktive/projekte/SH_der_Zukunft/Strategiepapier_Selbsthilfe_und_Rehabilitation.docx) (accessed  
60 14 August 2023).
35. Creswell JW, Plano Clark VL. Designing and Conducting Mixed Methods Research. SAGE; 2017.
36. Creswell JW, Creswell JD. Mixed methods procedures. In: Research design: Qualitative, quantitative, and mixed methods approaches. SAGE; 2018:213-246.

- 1  
2  
3 37. Wright MT. Partizipative Gesundheitsforschung: Ursprünge und heutiger Stand.  
4 Bundesgesundheitsbl. 2021;64:140-145.  
5 38. Flick U. An Introduction to Qualitative Research. SAGE; 2023.  
6 39. Helfferich C. Die Qualität qualitativer Daten. Springer-Verlag; 2011.  
7 40. Kuckartz U. Qualitative Inhaltsanalyse: Methoden, Praxis, Computerunterstützung. Beltz Juventa;  
8 2012.  
9 41. Dresing T, Pehl T. Praxisbuch Transkription. Regelsysteme, Software und praktische Anleitungen  
10 für qualitative ForscherInnen. Marburg; 2018.  
11 42. Braun V, Clarke V. Thematic Analysis. SAGE; 2006:77-101.  
12 43. Rehakliniken in Deutschland 2023. Available online:  
13 <https://www.rehakliniken.de/rehakliniken/kliniksuche> (accessed 10 October 2023).  
14 44. Körner M. Interprofessional teamwork in medical rehabilitation: a comparison of multidisciplinary  
15 and interdisciplinary team approach. Clin Rehabil. 2010;24(8):745-755.  
16 45. Körner M, Luzay L, Plewnia A, Becker S, Rundel M, Zimmermann L, Müller C. A cluster-randomized  
17 controlled study to evaluate a team coaching concept for improving teamwork and patient-  
18 centeredness in rehabilitation teams. PloS one. 2017;12(7): e0180171.  
19 46. Schubert M, Kämpf D, Wahl M, Hofmann S, Girbig M et al. MRSA point prevalence among health  
20 care workers in German rehabilitation centers: a multi-center, cross-sectional study in a non-  
21 outbreak setting. Int J Environ Res Public Health. 2019;16(9):1660.  
22 47. Ziegler E, Nickel S, Trojan A, Klein J, Kofahl C. Self-help friendliness in cancer care: A cross-sectional  
23 study among self-help group leaders in Germany. Health Expect. 2022;25(6):3005-3016.  
24 48. Trojan A, Nickel S, Kofahl C. Implementing 'self-help friendliness' in German hospitals: a  
25 longitudinal study. Health Promot Int. 2016;31(2):303-313.  
26 49. Östlund U, Kidd L, Wengström Y, et al. Combining qualitative and quantitative research within  
27 mixed method research designs: A methodological review. Int J Nurs Stud 2011;48:369–83.  
28  
29  
30  
31  
32  
33  
34  
35

### Contributors

36  
37 CK planned and leads the project. EZ supervises the study. EZ, IK, SB and AT contributed to the planning  
38 of the study. CK, EZ, IK, AT, TB, NU and SB are involved in executing the study. EZ outlined and wrote  
39 the manuscript. CK revised sections of the manuscript critically. AT provided guidance for the study  
40 and advice for the manuscript. TB assisted in preparing references and figures for the manuscript and  
41 public relations material. All authors approved the final manuscript.  
42  
43  
44  
45

### Funding

46  
47  
48 This work was supported by the German Pension Insurance Federation (Deutsche Rentenversicherung  
49 Bund) grant number 8011-106-31/31.148.  
50  
51  
52

### Competing interests

53  
54 The authors declare no conflicts of interest.  
55  
56  
57

### Acknowledgement

1  
2  
3 The authors thank all facilities, organisations and individuals that agreed to support the project and  
4 participate in the study.  
5  
6  
7

### 8 **Patient and public involvement**

9  
10 Patients and/or the public will be involved in the design of interview guides and survey instruments,  
11 reporting, and dissemination plans of this research. Refer to the Methods section for further details.  
12  
13

### 14 **Patient consent for publication**

15  
16 Not applicable.  
17  
18

### 19 **Ethics approval**

20  
21 Ethics approval was obtained from the Local Psychological Ethics Committee at the Center for  
22 Psychosocial Medicine, University Medical Center Hamburg (approval number LPEK-0648).  
23  
24  
25

### 26 **Provenance and peer review**

27  
28 Not commissioned; externally peer reviewed.  
29  
30  
31

### 32 **Supplemental material**

33  
34 This content has been supplied by the author(s). It has not been vetted by BMJ Publishing Group  
35 Limited (BMJ) and may not have been peer-reviewed. Any opinions or recommendations discussed are  
36 solely those of the author(s) and are not endorsed by BMJ. BMJ disclaims all liability and responsibility  
37 arising from any reliance placed on the content. Where the content includes any translated material,  
38 BMJ does not warrant the accuracy and reliability of the translations (including but not limited to local  
39 regulations, clinical guidelines, terminology, drug names and drug dosages), and is not responsible for  
40 any error and/or omissions arising from translation and adaptation or otherwise.  
41  
42  
43  
44

### 45 **Open access**

46  
47 This is an open access article distributed in accordance with the Creative Commons Attribution Non  
48 Commercial (CC BY-NC 4.0) license, which permits others to distribute, remix, adapt, build upon this  
49 work non-commercially, and license their derivative works on different terms, provided the original  
50 work is properly cited, appropriate credit is given, any changes made indicated, and the use is non-  
51 commercial. See: <http://creativecommons.org/licenses/by-nc/4.0/>.  
52  
53  
54

### 55 **ORCID iDs**

56  
57 Elâ Ziegler <https://orcid.org/0000-0002-2847-8087>

58  
59 Nicole Usko <https://orcid.org/0009-0004-0000-7699>  
60

1  
2  
3 Christopher Kofahl <https://orcid.org/0000-0002-0503-3077>  
4  
5  
6

7 **Figure 2** Research flow

8 *Abbreviations: WS Workshop, SHG Self-Help Groups, SHO Self-Help Organisations, SHC Self-Help*  
9 *Clearinghouses*  
10

11  
12  
13 **Supplementary information**

14 Interview guide for rehabilitation clinics  
15  
16  
17  
18  
19  
20  
21  
22  
23  
24  
25  
26  
27  
28  
29  
30  
31  
32  
33  
34  
35  
36  
37  
38  
39  
40  
41  
42  
43  
44  
45  
46  
47  
48  
49  
50  
51  
52  
53  
54  
55  
56  
57  
58  
59  
60

For peer review only

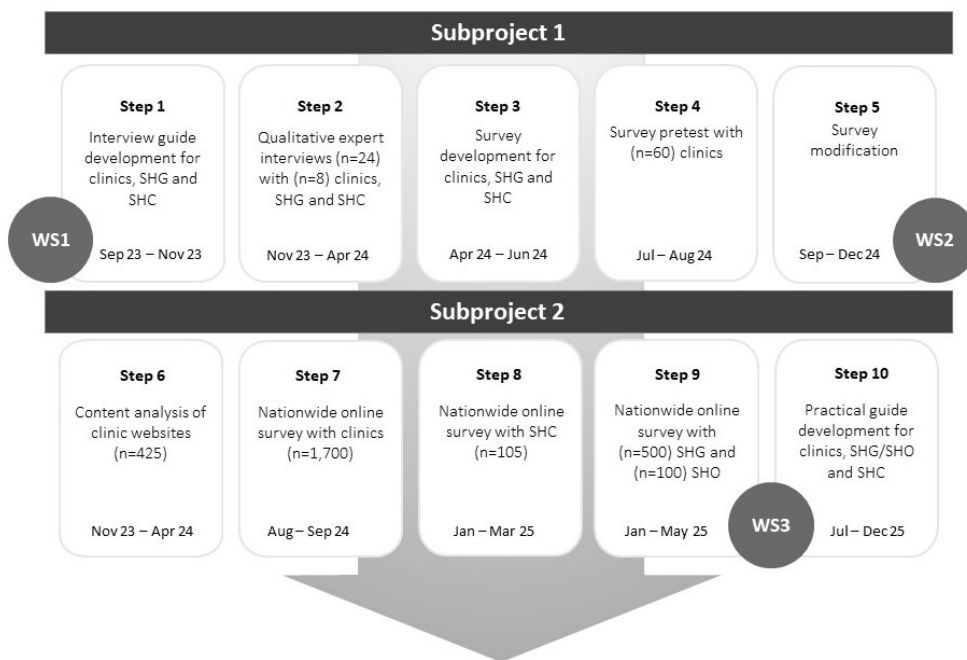

Figure 1 Research flow  
Abbreviations: WS Workshop, SHG Self-Help Groups, SHO Self-Help Organisations, SHC Self-Help Clearinghouses

245x167mm (96 x 96 DPI)



## SUPPLEMENTARY INFORMATION

### Interview guide for rehabilitation clinics

#### a) Introduction/Introductory questions

- Thanks for agreement to participate
- Brief summary of the project/goals/team
- Importance of the interview for the exploration of the cooperation process and the development of a standardised questionnaire
- Goal: Exchange of experiences regarding cooperation work, there is no right/wrong (experiences, wishes, needs)
- Consent to audio recording / recording of interview
- Anonymity or visibility in reports desired? Assure confidentiality
- Introduction: How long have you been active as self-help representative/contact person in the rehabilitation clinic? Was there a self-help representative before your employment in this position?
- Would you please briefly describe your responsibilities? Do you receive additional compensation or other benefits for this position?
- Which patients do you usually deal with (briefly)?

#### b) Questions about the importance of SH

- In your opinion as representative in a rehabilitation clinic, what is the importance of self-help for patients in rehabilitation clinics?

#### c) Main part/questions on cooperation

##### 1. Development of cooperation

- Which self-help actors (SHG/SHO/SHC) are you in contact with?
- Could you describe how your cooperation with the self-help actors (SHG/SHO/SHC) we are interviewing as well came about?  
*Since when? Who took the initiative/established contact? With what goal/expectations/motivation), On what basis? (Framework conditions: legal requirements, guidelines, provider structures), To what extent?*

##### 2. Organisation of Cooperation

- In what form does your rehabilitation clinic cooperate with these self-help actors and, if applicable, a SHC?
- What are the main goals of the cooperation?
- What self-help services do you offer at the rehabilitation clinic? Who offers them? Where do the services take place? Who exactly are the services aimed at? How are they accepted?
- With regard to the cooperation between SH and rehabilitation clinics, the concept of self-help friendliness (SHF) is a central topic. The concept contains five quality criteria for SHF. Do you know these criteria and are they implemented in your rehabilitation clinic?

**Name five quality criteria for SHF. Please indicate to what extent the statements apply to your cooperating rehabilitation clinic.**

- If you had to make a spontaneous assessment, to what extent is criteria x implemented?
- By whom and with which measures is criteria x implemented?

- Which (supportive and obstructive) factors play a role in the implementation of the criteria? (after asking about the five criteria)
- Are the measures for implementing the criteria regularly discussed in a quality circle or team meeting?
- Do you find the five criteria sufficient? If you had a free choice and could add criteria, which ones would you add?

*Implementation of the cooperation, SHF quality criteria (additional: public relations intensity, website information, display of information material, provision of rooms, exchange of experiences, participation in quality circles, further training opportunities, participation), importance of the cooperation, integration into QM (what, how, where, when, how often, with whom, by whom)*

- Are patients referred to SHG by your rehabilitation clinic? If yes, through which access routes?
- How could the motivation of rehabilitation patients to join an SHG be increased? What influence do they have?
  - Certain actors from the self-help and rehabilitation sector (e.g. self-help representatives of the rehabilitation clinic, local self-help clearinghouses, SPiG network)
  - Framework conditions (in particular contracts/agreements) on the success of cooperation with the rehabilitation clinic?

*Health policy guidelines by federal/state ministries, organisational structures, contracts, role/responsibilities of SH and rehabilitation providers/associations, sponsors, certification pressure) Resources (personnel: Are there SHRs? Activities, areas of responsibility, time, space, financial), systems (guidelines for action, QM integration, etc.), digital services*

### **3. Evaluation/Assessment of the Cooperation process**

- How would you rate the overall quality of the cooperation (school grades)?  
*In addition: Regular evaluations, effectiveness (successful mediation, acceptance, motivation, actual use), importance for rehabilitants + subjective benefits, sustainability of cooperation, digital offers*

### **4. Needs**

- What would you like to see to improve cooperation with rehabilitation clinics and SHC?
- Do you have any wishes regarding your cooperation with certain actors in the self-help, rehabilitation or health care sectors as a whole and in particular with the SPiG network?

*Structures/framework conditions, resources (personnel/time/space, acquisitions), SHG presence + offer, external presentation of the SHR, plans and wishes (own and rehabilitation clinics + possibly SHC, e.g. financial compensation etc.), communication between the actors, digital offers, outlook*

#### **d) Final questions and information**

- Is there anything else you would like to tell me about your work as a representative?
- Are there any relevant points that remained open during the interview?
- Information about the project and ways to contact us
- Reference to homepage and next steps (evaluation, results for the questionnaire)
- Thanks

# BMJ Open

## Self-help friendliness and cooperation with self-help groups among rehabilitation clinics in Germany (KoReS): a mixed-methods study protocol

|                                 |                                                                                                                                                                                                                                                                                                                                                                                                                                                                                                                                                                                                                                              |
|---------------------------------|----------------------------------------------------------------------------------------------------------------------------------------------------------------------------------------------------------------------------------------------------------------------------------------------------------------------------------------------------------------------------------------------------------------------------------------------------------------------------------------------------------------------------------------------------------------------------------------------------------------------------------------------|
| Journal:                        | <i>BMJ Open</i>                                                                                                                                                                                                                                                                                                                                                                                                                                                                                                                                                                                                                              |
| Manuscript ID                   | bmjopen-2023-083489.R1                                                                                                                                                                                                                                                                                                                                                                                                                                                                                                                                                                                                                       |
| Article Type:                   | Protocol                                                                                                                                                                                                                                                                                                                                                                                                                                                                                                                                                                                                                                     |
| Date Submitted by the Author:   | 13-Feb-2024                                                                                                                                                                                                                                                                                                                                                                                                                                                                                                                                                                                                                                  |
| Complete List of Authors:       | Ziegler, Elâ; University Medical Center Hamburg-Eppendorf, Institute of Medical Sociology<br>Bartzsch, Thea; University Medical Center Hamburg-Eppendorf, Institute of Medical Sociology<br>Trojan, Alf; University Medical Center Hamburg-Eppendorf, Institute of Medical Sociology<br>Usko, Nicole; University Medical Center Hamburg-Eppendorf, Institute of Medical Sociology<br>Krahn, Ines; Network for Self-Help Friendliness and Patient Orientation in Health Care<br>Bütow, Sabine; German Working Group Self-Help Groups e.V.<br>Kofahl, Christopher; University Medical Center Hamburg-Eppendorf, Institute of Medical Sociology |
| <b>Primary Subject Heading</b>: | Patient-centred medicine                                                                                                                                                                                                                                                                                                                                                                                                                                                                                                                                                                                                                     |
| Secondary Subject Heading:      | Rehabilitation medicine, Patient-centred medicine, Health services research                                                                                                                                                                                                                                                                                                                                                                                                                                                                                                                                                                  |
| Keywords:                       | Observational Study, REHABILITATION MEDICINE, Patient-Centered Care, Patient Participation, Health Services, Social Support                                                                                                                                                                                                                                                                                                                                                                                                                                                                                                                  |
|                                 |                                                                                                                                                                                                                                                                                                                                                                                                                                                                                                                                                                                                                                              |

SCHOLARONE™  
Manuscripts

## Self-help friendliness and cooperation with self-help groups among rehabilitation clinics in Germany (KoReS): a mixed-methods study protocol

Elâ Ziegler,<sup>1</sup> Thea Bartzsch,<sup>1</sup> Alf Trojan,<sup>1</sup> Nicole Usko,<sup>1</sup> Ines Krahn,<sup>2</sup> Sabine Bütow,<sup>3</sup> Christopher Kofahl<sup>1</sup>

<sup>1</sup>Institute of Medical Sociology, University Medical Center Hamburg-Eppendorf, Martinistraße 52, 20246 Hamburg, Germany

<sup>2</sup>Network for Self-Help Friendliness and Patient Orientation in Health Care, ScharfesträÙe 17, 14169 Berlin, Germany

<sup>3</sup>German Working Group Self-Help Groups e.V., Friedrichstrasse 28, 35392 Gießen, Germany

### Correspondence

Elâ Ziegler, University Medical Center Hamburg-Eppendorf, Institute of Medical Sociology, MartinistraÙe 52, 20246 Hamburg, Germany. E-mail: e.ziegler@uke.de (ORCID <https://orcid.org/0000-0002-2847-8087>)

### Keywords

*mixed methods, study protocol, rehabilitation, peer support, mutual aid, self-help groups, cooperation, patient orientation, comprehensive care, self-help friendliness*

### ABSTRACT

**Introduction:** Self-help is an important complement to medical rehabilitation for people with chronic diseases and disabilities. It contributes to stabilising rehabilitation success and further coping with disease and disability. Rehabilitation facilities are central in informing and referring patients to self-help groups. However, sustainable cooperation between rehabilitation and self-help, as can be achieved using the concept of self-help friendliness in health care, is rare, as is data on the cooperation situation.

**Methods and analysis:** The KoReS study will examine self-help friendliness and cooperation between rehabilitation clinics and self-help associations in Germany, applying a sequential exploratory mixed-methods design. In the first qualitative phase, problem-centred interviews and focus groups are conducted with representatives of self-help-friendly rehabilitation clinics, members of their cooperating self-help groups and staff of self-help clearinghouses involved based on a purposeful sampling. Qualitative data collected will be analysed through content analysis utilising MAXQDA. The findings will serve to develop a questionnaire for a quantitative second phase. Cross-sectional online studies will survey staff responsible for self-help in rehabilitation clinics nationwide, representatives of self-help groups, and staff of self-help clearinghouses. Quantitative data analysis with SPSS will include descriptive statistics, correlation, subgroup and multiple regression analyses. Additionally, a content analysis of rehabilitation clinics' websites will evaluate the visibility of self-help in their public relations.

**Ethics and dissemination:** The UKE Local Psychological Ethics Committee at the Centre for Psychosocial Medicine granted ethical approval (reference number LPEK-0648; 10.07.2023). Informed consent will be obtained from all participants. Results dissemination will comprise various formats such as workshops, presentations, homepages and publications for the international scientific community,

1  
2  
3 rehabilitation centres, self-help organisations and the general public in Germany. For relevant  
4 stakeholders, practical guides and recommendations to implement self-help friendliness will derive  
5 from the results to strengthen patient orientation and cooperation between rehabilitation and self-  
6 help to promote the sustainability of rehabilitation processes.  
7  
8  
9

## 10 **STRENGTHS AND LIMITATIONS OF THIS STUDY**

- 12 • The mixed-methods design allows for a comprehensive analysis of the cooperation situation  
13 between rehabilitation and self-help by combining the qualitative data on in-depth insights from  
14 experts in the field with quantitative survey data to quantify the extent of cooperation and its  
15 framework conditions (triangulation).
- 16 • This study is a multicentre, multi-perspective investigation being conducted across Germany.
- 17 • A panel of experts from the fields of self-help, rehabilitation, patient-oriented research and public  
18 health accompanies the study by advising on methodology and instrument development and  
19 supporting participant recruitment as well as public relations.
- 20 • There is potential for a self-selection bias among rehabilitation centres and self-help organisations  
21 participating in the surveys.
- 22 • Patients of the rehabilitation clinics are not participating in the surveys, as the study is conducted  
23 at an organisational level, focusing on institutional collaboration.  
24  
25  
26  
27  
28  
29

## 30 **INTRODUCTION**

31 People with chronic diseases and disabilities face considerable needs for adjustments to cope with  
32 their illness and self-management to master everyday life with as few restrictions in their quality of life  
33 as possible.[1] To achieve these aims, several offers of medical rehabilitation and reintegration exist  
34 for the more than 1 million annual applicants for medical rehabilitation in Germany.[2,3] Medical  
35 rehabilitation in Germany includes follow-up (aftercare) rehabilitation taking place immediately after  
36 a hospital stay, indication-specific rehabilitation tailored to a particular illness such as cancer, addiction  
37 or musculoskeletal disorders, geriatric rehabilitation for older patients with multiple health issues and  
38 additionally, target group-specific rehabilitation for specific groups such as children, adolescents,  
39 parents, or carers.[3] Medical rehabilitation throughout Germany is mainly provided on an inpatient  
40 basis, but can also take place on an outpatient basis. Orthopaedic and rheumatic diseases are the most  
41 common rehabilitation indication areas, which account for more than a third of inpatient rehabilitation  
42 services,[3] along other prevalent indications such as cancer, addiction, psychosomatic disorders,  
43 injuries, or neurological diseases. However, rehabilitation measures usually cannot cover the entire  
44 scope of topics and issues relevant to the everyday lives of rehabilitants due to illness or disability.[4]

45  
46  
47  
48  
49 To close this gap, collective self-help, also known as peer support, offers an important supplement to  
50 medical rehabilitation. Self-help comprises self-help groups (SHG), self-help organisations (SHO) and  
51 self-help clearinghouses (SHC). It contributes to coping with the disease and stabilising the success of  
52 rehabilitation.[5,6] The authentic knowledge and expertise from the shared experiences of other  
53 similarly affected patients and their relatives[7] form a 'solidarity-based mutual aid'.[8] Self-help in  
54 Germany is provided by estimated 100,000 SHG and more than 1,000 SHO at national and federal  
55 levels.[9] They are supported by a professional self-help system consisting of more than 300 SHC, which  
56 operate in regional networks in social and health care and maintain additional branch offices providing  
57 professional support services across Germany.[9] The SHC in Germany are working as central contact  
58 points for regional SHG and anyone interested in information on self-help. The main tasks of SHC  
59  
60

1  
2  
3 include advising and referring interested parties to SHG, assistance in setting up new SHG, technical  
4 and organisational support for existing SHG, public relations work for self-help and existing SHG, and  
5 networking and cooperating with other support organisations in the social and healthcare sector.[8,9]  
6 The positive effects of health-related self-help are manifold and have been demonstrated in numerous  
7 studies. Predominantly, they relate to health and psychosocial outcomes, as self-help provides  
8 psychosocial and emotional relief, for instance.[10,11] Moreover, self-help has been shown to foster  
9 empowerment[12,13] and health literacy,[14] i.e. health-related knowledge,[12,15] self-management  
10 and self-efficacy[13,16,17] of people with health related or social problems. It can further alleviate  
11 disease-related symptoms and promote healing processes through developing and maintaining  
12 healthy behaviours.[18,19]  
13  
14

15  
16 In order to participate in self-help activities, knowledge about self-help and referral to SHG is essential.  
17 Rehabilitation facilities are of central importance to enable this by providing information about self-  
18 help to their patients.[20] After diagnosis and acute treatment, the phase of rehabilitation is an  
19 appropriate time to draw attention to self-help, as it marks a time of convalescence in which patients  
20 recover physically and emotionally, and address the coping needs that now arise.[21] As rehabilitation  
21 usually lasts several weeks, it opens up further possibilities to systematically inform about the various  
22 options for coping with the disease or disability and stabilising the success of rehabilitation in the long  
23 term. Thus, it represents the 'initial spark',[21 p. 131] especially as the rehabilitation goals are generally  
24 not completed in the rehabilitation service itself.[22,23]  
25  
26

27  
28 A prerequisite for successful information and referral to self-help from rehabilitation facilities is  
29 reliable and sustainable cooperation. To achieve this, efforts have been made over the last two  
30 decades [24] and have led to some positive developments.[25-27] One measure of particular relevance  
31 is the concept of self-help friendliness (SHF) in health care and its quality criteria to establish and  
32 maintain systematic cooperation.[26,28,29] It was initiated in 2004 within a consensus process of  
33 stakeholders in the German self-help system and representatives of various health care institutions to  
34 develop, evaluate and implement quality criteria for systematic, reliable and sustainable collaboration  
35 between health care institutions and patient groups.[26,28,29] The SHF concept describes how  
36 cooperation between SHG, SHC and healthcare facilities can be structured, systematically designed  
37 and permanently implemented in practice.[26] Verifiable quality criteria (see **supplementary file 1** for  
38 quality criteria for rehabilitation clinics) were developed to assess the implementation and degree of  
39 SHF in healthcare facilities.[26] Some of these indicators of SHF have been implemented in quality  
40 management systems in healthcare facilities, however not sufficiently.[30] Consequently, to  
41 systematically promote, implement and disseminate the SHF concept, the nationwide network 'Self-  
42 Help Friendliness and Patient Orientation in Health Care' (SPiG) was founded in 2009.[30,31] The SPiG  
43 network consists of over 450 active members, including 40 rehabilitation clinics. It awards healthcare  
44 facilities that have successfully implemented the SHF quality criteria [31] with the Self-help Friendliness  
45 quality seal, which is valid for three years. To date, 19 rehabilitation clinics and 28 hospitals have been  
46 awarded this quality seal, in some cases up to five times.[31]  
47  
48  
49  
50

51  
52 Yet, despite these developments and increased positive attitudes of rehabilitation facilities towards  
53 self-help,[27] the concept is not widely used. Overall cooperation, including information about self-  
54 help and referral to SHG in the rehabilitation process, remains low.[32-34] Currently, there is a lack of  
55 data on the frequency, design and extent of cooperation between German self-help and rehabilitation  
56 facilities. Furthermore, it seems necessary to identify framework conditions (e.g. legal requirements,  
57 regulations, contracts, regional structures) and factors that facilitate and hinder cooperation in this  
58 context. Recommendations for action, such as guidelines, can then be derived from this, also to be  
59 considered for modifying existing QM systems.  
60

## Study aims and objectives

Against this backdrop, the joint project of the Institute for Medical Sociology (IMS) at the University Medical Center Hamburg-Eppendorf (UKE) and the SPiG network investigates the cooperation between rehabilitation clinics and self-help nationwide. The project funded by the German Pension Insurance Federation examines the framework conditions and factors that aid or hinder this cooperation, with particular focus on the concept of SHF and its quality criteria for rehabilitation clinics. The aim is to anchor the cooperation between rehabilitation clinics and SHO and SHG more firmly in a patient-oriented manner to ensure the sustainability of rehabilitation measures through recommendations for action and implementation of SHF and its corresponding quality criteria.

The first subproject of the study explores the status and development potential of SHF at the member rehabilitation clinics of the SPiG network. Subproject two focuses on frequency, intensity and models of good practice regarding cooperation with self-help in rehabilitation clinics overall. The following questions are to be answered as part of the two subprojects:

### *Subproject 1*

1. Which experience-based factors and preconditions contribute to self-help-friendly cooperation between rehabilitation clinics and self-help, what are possible obstacles?
2. From the perspective of rehabilitation clinics and self-help, how well can the SHF criteria be implemented in rehabilitation clinics, and how can cooperation with self-help be systematised and maintained?
3. What has been the experience of staff of SHC involved in cooperation to implement SHF in rehabilitation clinics?

### *Subproject 2*

1. To what extent do cooperations between SHG and rehabilitation clinics exist, how can they be described, and which models can be distinguished?
2. Which facilitating and hindering factors for good cooperation are reported?
3. How disposed are rehabilitation clinics to implement measures for a systematic cooperation with SHG, or specifically to implement the concept of SHF, and how can this be increased?
4. What are the needs for adjustments in the QM systems relevant to rehabilitation clinics?

## METHODS AND ANALYSIS

### Study design

The KoReS study follows an exploratory sequential mixed-methods design, including qualitative and quantitative research consecutively.[35,36] It consists of two study subprojects, with a total of ten core research steps and three workshops (see Figure 1). The project is scheduled to run from August 2023 (beginning with the planning phase) to December 2025 (concluding with the writing of guides and reports), with preliminary qualitative data collection commencing in November 2023 and survey data collection starting in July 2024.

### Patient and public involvement

Patient and public involvement is an integral part of both subprojects. Representatives of self-help associations are part of the project team, having expertise in collaborating with diverse SHG of various indication groups. In addition, a scientific advisory board and a consortium of relevant umbrella organisations accompany the study process. The scientific advisory board consists of patient

1  
2  
3 representatives and experts from the fields of self-help, rehabilitation, chronic care, patient-oriented  
4 research and public health in Germany, Austria and Switzerland. Supporting organisations consist of  
5 federal working groups for self-help and rehabilitation, welfare associations, QM representatives of  
6 rehabilitation clinics, spokespersons of SHG, representatives of SHO, members of the SPiG network,  
7 and staff of SHC. They are and will be involved in the project conceptualisation, instrument  
8 development, revision of interview guides and questionnaires and overall project realisation, aiding in  
9 public relations work and recruitment of study participants. The mentioned stakeholders will advise  
10 on the research process and procedures as well as the interpretation of the results, contributing to  
11 how the outcomes can be used in practice, in line with the participation stages in health research.[37]  
12 Moreover, the perspectives and insights of patient representatives obtained through the qualitative  
13 interviews will directly be incorporated into this study for the quantitative phase. Three workshops will  
14 be held with all stakeholders at the beginning, middle and end of the project to foster the collaboration  
15 and dissemination of results.  
16  
17  
18

### 19 **Qualitative research**

20  
21 The qualitative research phase marks the beginning of subproject 1 to explore the cooperation status  
22 and potential between 8 out of the 40 rehabilitation clinics that are members of the SPiG network and  
23 corresponding self-help facilities through in-depth interviews and focus groups. It aims to trace the  
24 processes in the development of cooperation and to identify the favourable and obstructive factors  
25 along the way. In addition, it will be investigated whether, how and under what conditions cooperation  
26 with self-help (and, if applicable, compliance with the SHF criteria) is implemented and actually  
27 practised. In particular, motives, expectations, needs and experiences of both rehabilitation clinics and  
28 self-help associations will be focussed on.  
29  
30  
31

#### 32 *Sample and data collection*

33  
34 Semi-structured guideline-based interviews and focus groups with 8-16 representatives of 8 self-help  
35 friendly rehabilitation clinics, 8-24 members of cooperating SHG and 6-8 employees of the regional  
36 self-help clearinghouses will be conducted by the researchers based on a purposeful sampling.[38]  
37 Sampling criteria are to cover a broad range of different indications of the five core indication groups  
38 (oncological, neurological, orthopaedic, psychosomatic and addictive diseases or disorders), selecting  
39 member clinics with different levels of experience and varying membership duration in the network  
40 (quality seal award status), and regional distribution of the rehabilitation clinics across different federal  
41 states. Participants from the rehabilitation clinics are employees responsible for cooperation with self-  
42 help (QM officers, social services and (other) contact persons for self-help). In addition, the  
43 experiences of the cooperating SHG or SHO and the employees of SHC responsible for SHF will be  
44 surveyed. If more than three protagonists from the self-help associations are involved in the  
45 cooperation with the respective rehabilitation clinic, focus groups will be conducted instead of  
46 individual interviews. The interview partners are recruited via gatekeeper access through the SPiG  
47 network by phone and e-mail, passing on the project description and interview topics with the  
48 participation request.  
49  
50  
51

52  
53 After participants' consent, the interviews and optional focus groups will be conducted via online video  
54 systems, by phone or, alternatively, face-to-face. The interviews will be audio-recorded and  
55 supplemented by handwritten transcripts. Volunteer spokespersons and leaders of SHG will receive an  
56 incentive of 30€ for their participation. The guidelines for the semi-structured expert interviews are  
57 developed using the SPSS method (collect, check, sort and subsume)[39] in consultation with all  
58 cooperation partners and the scientific advisory board. The interview topics were specified with the  
59 participants in the first workshop. They contain introductory questions, open narrative prompts,  
60 questions to maintain the conversation and concrete follow-up questions on four core topics (see



1  
2  
3 **supplementary file 2** for exemplary guide): origin and development of the cooperation, cooperation  
4 design and organisation, evaluation and assessment of the cooperation, as well as cooperation needs.  
5

#### 6 *Data analysis*

7  
8 The audio recordings of the interviews and focus groups will be anonymised and transcribed by student  
9 assistants using the transcription programme F4, following the recommendations of Kuckartz,[40]  
10 Dresing and Pehl.[41] Transcripts will be considered in full for data analysis and coded deductively  
11 (according to the topics of the guideline) and inductively (from the transcripts), computer-assisted with  
12 the MAXQDA software. Coding units each consist of a complete sentence, and in vivo codes will be  
13 used for naming codes. The qualitative data analysis will be carried out using thematic [42] and content  
14 analysis.[40] The results form the basis for developing a questionnaire to survey the cooperation  
15 between rehabilitation clinics, SHG/SHO and SHC. Furthermore, the results should aid improving the  
16 SHF concept to implement measures that support cooperation more effectively in other rehabilitation  
17 clinics.  
18  
19

#### 20 **Quantitative research**

21  
22 In the second subproject, three nationwide cross-sectional online surveys will be deployed as part of  
23 the quantitative research to examine frequency, intensity and models of cooperation among SHG and  
24 SHO, SHC and all rehabilitation clinics in Germany.  
25  
26

#### 27 *Sample and data collection*

28  
29 Based on the preliminary qualitative study and already existing scales about SHF, a questionnaire will  
30 be developed and piloted (see steps 3 and 4 of the research flow in Figure 1) with the QM officers and  
31 social services of the above mentioned 40 member clinics of the SPiG network and additional 20 non-  
32 member rehabilitation clinics. After psychometric pretesting, the questionnaire will be modified,  
33 where applicable and finalised in the second workshop (step 5). It will be used for the online survey of  
34 QM officers and social services of all the approximately 1700 inpatient, partially inpatient and  
35 outpatient rehabilitation clinics in Germany listed in the current database of Vidal MMI Germany  
36 GmbH[43] and approximately 600 representatives of the SHG and SHO corresponding to the main  
37 indications of the rehabilitation clinics. Based on previous studies, we expect at least 100 SHG and 20  
38 SHO of each of the five core indications to participate. The estimated response rate of 20-30%  
39 regarding clinic participation draws on previous studies but is also depending on the relevant contact  
40 person in the clinics.[44-46] In parallel to the clinic survey, staff of the 105 SHC who are members of  
41 the SPiG network will be surveyed online about their experiences with SHF, with an estimated  
42 participation rate of 80% based on their membership commitment and the associated objectives and  
43 field of activity to promote SHF. To enable triangulation and multi-perspectivity, the questionnaire to  
44 be developed for this purpose will be adapted from the questionnaire for the rehabilitation clinics to  
45 the perspective of self-help facilities. Letters of recommendation from the relevant umbrella  
46 organisations and cooperation partners are attached to the participation call via post and e-mail, and  
47 the project will be advertised via various channels as described above to increase participation rates.  
48  
49  
50  
51  
52  
53  
54  
55  
56  
57  
58  
59  
60  
61  
62  
63  
64  
65  
66  
67  
68  
69  
70  
71  
72  
73  
74  
75  
76  
77  
78  
79  
80  
81  
82  
83  
84  
85  
86  
87  
88  
89  
90  
91  
92  
93  
94  
95  
96  
97  
98  
99  
100  
101  
102  
103  
104  
105  
106  
107  
108  
109  
110  
111  
112  
113  
114  
115  
116  
117  
118  
119  
120  
121  
122  
123  
124  
125  
126  
127  
128  
129  
130  
131  
132  
133  
134  
135  
136  
137  
138  
139  
140  
141  
142  
143  
144  
145  
146  
147  
148  
149  
150  
151  
152  
153  
154  
155  
156  
157  
158  
159  
160  
161  
162  
163  
164  
165  
166  
167  
168  
169  
170  
171  
172  
173  
174  
175  
176  
177  
178  
179  
180  
181  
182  
183  
184  
185  
186  
187  
188  
189  
190  
191  
192  
193  
194  
195  
196  
197  
198  
199  
200  
201  
202  
203  
204  
205  
206  
207  
208  
209  
210  
211  
212  
213  
214  
215  
216  
217  
218  
219  
220  
221  
222  
223  
224  
225  
226  
227  
228  
229  
230  
231  
232  
233  
234  
235  
236  
237  
238  
239  
240  
241  
242  
243  
244  
245  
246  
247  
248  
249  
250  
251  
252  
253  
254  
255  
256  
257  
258  
259  
260  
261  
262  
263  
264  
265  
266  
267  
268  
269  
270  
271  
272  
273  
274  
275  
276  
277  
278  
279  
280  
281  
282  
283  
284  
285  
286  
287  
288  
289  
290  
291  
292  
293  
294  
295  
296  
297  
298  
299  
300  
301  
302  
303  
304  
305  
306  
307  
308  
309  
310  
311  
312  
313  
314  
315  
316  
317  
318  
319  
320  
321  
322  
323  
324  
325  
326  
327  
328  
329  
330  
331  
332  
333  
334  
335  
336  
337  
338  
339  
340  
341  
342  
343  
344  
345  
346  
347  
348  
349  
350  
351  
352  
353  
354  
355  
356  
357  
358  
359  
360  
361  
362  
363  
364  
365  
366  
367  
368  
369  
370  
371  
372  
373  
374  
375  
376  
377  
378  
379  
380  
381  
382  
383  
384  
385  
386  
387  
388  
389  
390  
391  
392  
393  
394  
395  
396  
397  
398  
399  
400  
401  
402  
403  
404  
405  
406  
407  
408  
409  
410  
411  
412  
413  
414  
415  
416  
417  
418  
419  
420  
421  
422  
423  
424  
425  
426  
427  
428  
429  
430  
431  
432  
433  
434  
435  
436  
437  
438  
439  
440  
441  
442  
443  
444  
445  
446  
447  
448  
449  
450  
451  
452  
453  
454  
455  
456  
457  
458  
459  
460  
461  
462  
463  
464  
465  
466  
467  
468  
469  
470  
471  
472  
473  
474  
475  
476  
477  
478  
479  
480  
481  
482  
483  
484  
485  
486  
487  
488  
489  
490  
491  
492  
493  
494  
495  
496  
497  
498  
499  
500  
501  
502  
503  
504  
505  
506  
507  
508  
509  
510  
511  
512  
513  
514  
515  
516  
517  
518  
519  
520  
521  
522  
523  
524  
525  
526  
527  
528  
529  
530  
531  
532  
533  
534  
535  
536  
537  
538  
539  
540  
541  
542  
543  
544  
545  
546  
547  
548  
549  
550  
551  
552  
553  
554  
555  
556  
557  
558  
559  
560  
561  
562  
563  
564  
565  
566  
567  
568  
569  
570  
571  
572  
573  
574  
575  
576  
577  
578  
579  
580  
581  
582  
583  
584  
585  
586  
587  
588  
589  
590  
591  
592  
593  
594  
595  
596  
597  
598  
599  
600  
601  
602  
603  
604  
605  
606  
607  
608  
609  
610  
611  
612  
613  
614  
615  
616  
617  
618  
619  
620  
621  
622  
623  
624  
625  
626  
627  
628  
629  
630  
631  
632  
633  
634  
635  
636  
637  
638  
639  
640  
641  
642  
643  
644  
645  
646  
647  
648  
649  
650  
651  
652  
653  
654  
655  
656  
657  
658  
659  
660  
661  
662  
663  
664  
665  
666  
667  
668  
669  
670  
671  
672  
673  
674  
675  
676  
677  
678  
679  
680  
681  
682  
683  
684  
685  
686  
687  
688  
689  
690  
691  
692  
693  
694  
695  
696  
697  
698  
699  
700  
701  
702  
703  
704  
705  
706  
707  
708  
709  
710  
711  
712  
713  
714  
715  
716  
717  
718  
719  
720  
721  
722  
723  
724  
725  
726  
727  
728  
729  
730  
731  
732  
733  
734  
735  
736  
737  
738  
739  
740  
741  
742  
743  
744  
745  
746  
747  
748  
749  
750  
751  
752  
753  
754  
755  
756  
757  
758  
759  
760  
761  
762  
763  
764  
765  
766  
767  
768  
769  
770  
771  
772  
773  
774  
775  
776  
777  
778  
779  
780  
781  
782  
783  
784  
785  
786  
787  
788  
789  
790  
791  
792  
793  
794  
795  
796  
797  
798  
799  
800  
801  
802  
803  
804  
805  
806  
807  
808  
809  
810  
811  
812  
813  
814  
815  
816  
817  
818  
819  
820  
821  
822  
823  
824  
825  
826  
827  
828  
829  
830  
831  
832  
833  
834  
835  
836  
837  
838  
839  
840  
841  
842  
843  
844  
845  
846  
847  
848  
849  
850  
851  
852  
853  
854  
855  
856  
857  
858  
859  
860  
861  
862  
863  
864  
865  
866  
867  
868  
869  
870  
871  
872  
873  
874  
875  
876  
877  
878  
879  
880  
881  
882  
883  
884  
885  
886  
887  
888  
889  
890  
891  
892  
893  
894  
895  
896  
897  
898  
899  
900  
901  
902  
903  
904  
905  
906  
907  
908  
909  
910  
911  
912  
913  
914  
915  
916  
917  
918  
919  
920  
921  
922  
923  
924  
925  
926  
927  
928  
929  
930  
931  
932  
933  
934  
935  
936  
937  
938  
939  
940  
941  
942  
943  
944  
945  
946  
947  
948  
949  
950  
951  
952  
953  
954  
955  
956  
957  
958  
959  
960  
961  
962  
963  
964  
965  
966  
967  
968  
969  
970  
971  
972  
973  
974  
975  
976  
977  
978  
979  
980  
981  
982  
983  
984  
985  
986  
987  
988  
989  
990  
991  
992  
993  
994  
995  
996  
997  
998  
999  
1000

53 The online surveys are conducted with Lime Survey to ensure data collection in compliance with data  
54 protection regulations. Participants receive an access link to the respective online questionnaire, study  
55 information and a consent and data protection declaration. After clicking on the consent button, the  
56 online questionnaire opens. Only cookies that allow the survey to continue are permitted. No IP  
57 addresses or personal data of the participants will be collected. Participation is voluntary and based  
58 on the professional function. Names and location details will be anonymised before analysis and  
59 publications. The surveys contain predominantly closed questions and free text fields on the four core  
60

1  
2  
3 topics of cooperation described above, and questions about the characteristics of the facilities. An  
4 adapted scale[47] of the psychometrically tested and validated Selp-K questionnaire [48] for measuring  
5 self-help and patient orientation in hospitals will be used to assess the implementation and degree of  
6 SHF, which has shown very good internal consistency ( $\alpha = .90$ ).[47]  
7

### 8 *Data analysis*

9  
10 The online survey software provides the survey data in downloadable database formats. Manual data  
11 entry is thus not needed. Student assistants will perform post-coding, categorisation, and  
12 anonymisation for free text responses. Research assistants will use syntax to perform variable  
13 encoding, scale and index building, and possible missing value imputations (i.e. mean value  
14 imputation). Univariate descriptive statistics (distributions, means, mode, median, SD, analysis of  
15 variance) will be used to assess frequency, intensity and models of cooperation and examine SHF  
16 implementation. Further, bivariate analyses (correlation, t-test, Chi<sup>2</sup>-test) will be conducted to  
17 compare subgroups by structural characteristics of the facilities in terms of their cooperation  
18 experiences, and possibly multivariate statistics (logistic and linear regression) will be executed to  
19 identify associations for high or low levels of cooperation, i.e. hindering and facilitating factors for  
20 cooperation. For quantitative data analysis, IBM SPSS Statistics 27 or higher will be used, and statistical  
21 significance will be set at an alpha level of 0.05.  
22  
23  
24

### 25 **Website content analysis**

26  
27 In addition, a website content analysis of a random sample of one-fourth of all rehabilitation clinics (N  
28  $\approx$  425), stratified by indications, will be conducted. Inclusion criteria are rehabilitation clinics in  
29 Germany with relevant indications and a corresponding available homepage. The websites will be  
30 screened for self-help references to quantify and evaluate the relevance of self-help in the public  
31 relations work of the facilities. For this purpose, a codebook with criteria for categorising self-help  
32 visibility will be developed to code the sample of webpages retrieved via Google. Relevant criteria  
33 include whether the website contains the word or synonyms of self-help, whether references to SHC,  
34 SHG and SHO are present, whether contact persons for self-help or a representative are available and  
35 if links to webpages of self-help exist, among others. The websites will be coded accordingly in SPSS or  
36 Excel concerning the fulfilment of the criteria, and an aggregated SHF-Index will be built to rate the  
37 visibility of self-help. Data analysis will comprise frequency counts and calculating means. A student  
38 assistant will conduct the analysis with guidance and support from a senior researcher.  
39  
40  
41

### 42 **Data triangulation**

43  
44 Both qualitative and quantitative data obtained from this project are considered as offering  
45 complementary information [49] on the subject of cooperation between rehabilitation and self-help  
46 facilities. The data will be collected sequentially and analysed separately in the initial stage. Thus, the  
47 first phase of qualitative data collection and analysis serves to explore cooperation between self-help  
48 and rehabilitation facilities from the perspectives and experiences of their responsible staff. These  
49 findings will inform the subsequent quantitative phase to develop an instrument for the quantitative  
50 survey of self-help and rehabilitation representatives. The process of integrating findings from the  
51 mixed methods will also take place at the interpretation stage after all data has been collected and  
52 analysed separately through triangulation [49] to gain a more comprehensive understanding of the  
53 facilitating and hindering factors, developments and needs concerning cooperation using these two  
54 different approaches.  
55  
56  
57  
58  
59  
60

## **ETHICS AND DISSEMINATION**

### **Ethical considerations**

Ethical approval for the study was granted by the Local Psychological Ethics Committee at the Centre for Psychosocial Medicine of the University Medical Centre Hamburg-Eppendorf (reference number LPEK-0648). A data protection concept was developed for the project to ensure adherence to relevant national and international data protection regulations for all data. It has been reviewed and approved by the data protection officers of the German Pension Insurance Federation. As part of the research project, only personal data relating to the respective institution, the job title of the respondents and their function in the rehabilitation institutions or self-help associations is collected. No specific personal data containing private information of the participants is collected. The personal data provided will be anonymised for analyses. Scientific publications will also only be made in anonymised form, unless the participants explicitly request to be named, for instance with regard to examples of good practice. Confidentiality will be maintained at all levels of data management and research data will be processed in accordance with applicable data protection regulations. Study data will be stored password-protected at the IMS for ten years and is only accessible to the research team. In accordance with national requirements and the principles of the Declaration of Helsinki, informed consent will be obtained from all participants prior to participation in the study. It contains information on the study objectives, scientific significance, duration, possible remuneration, the voluntary and anonymous nature of participation, information on data protection and the possibility to withdraw or terminate participation in the study at any time without adverse consequences. There are no specific risks for the participants. Participants have a contact person and only adults capable of giving consent can participate. The qualitative interviews and additional focus groups will be conducted solely by trained researchers, and interview guides and questionnaires will be pre-tested to minimise any possible psychological burden for the participants. The study has been (pre-)registered at Open Science Framework (OSF) (registration DOI <https://doi.org/10.17605/OSF.IO/R9UQK>).

### **Dissemination plan**

Several dissemination channels will be considered, addressing the scientific community as well as rehabilitation stakeholders, self-help organisations, and the general public in Germany. Project progress and results will be presented and developed in participatory workshops and national conferences, and further reporting culture will be promoted through the project homepage, created for visibility and dissemination. In addition, the SPiG network and the supporting organisations will provide up-to-date information about the project progress on their homepages, newsletters and events. Publications in scientific peer-reviewed journals are planned for the international scientific community. Practical aids and recommendations for action to implement self-help friendliness for the relevant actors will derive from the results to systematically establish cooperation between self-help representatives and rehabilitation clinics, provide people with chronic illnesses and disabilities with self-help services, stabilise rehabilitation successes and foster coping and self-management. A final report on the results will also be prepared for the funder.

### Contributors

CK planned and leads the project. EZ supervises the study. EZ, IK, SB and AT contributed to the planning of the study. CK, EZ, IK, AT, TB, NU and SB are involved in executing the study. EZ outlined and wrote the manuscript. CK revised sections of the manuscript critically. AT provided guidance for the study and advice for the manuscript. TB assisted in preparing references and figures for the manuscript and public relations material. All authors approved the final manuscript.

### Funding

This work was supported by the German Pension Insurance Federation (Deutsche Rentenversicherung Bund) grant number 8011-106-31/31.148.

### Competing interests

The authors declare no conflicts of interest.

### Acknowledgements

The authors thank all facilities, organisations and individuals that agreed to support the project and participate in the study.

### Patient and public involvement

Patients and/or the public will be involved in the design of interview guides and survey instruments, reporting, and dissemination plans of this research. Refer to the Methods section for further details.

### Patient consent for publication

Not applicable.

### Ethics approval

Ethics approval was obtained from the Local Psychological Ethics Committee at the Center for Psychosocial Medicine, University Medical Center Hamburg (approval number LPEK-0648).

### Provenance and peer review

Not commissioned; externally peer reviewed.

### Supplemental material

This content has been supplied by the author(s). It has not been vetted by BMJ Publishing Group Limited (BMJ) and may not have been peer-reviewed. Any opinions or recommendations discussed are

solely those of the author(s) and are not endorsed by BMJ. BMJ disclaims all liability and responsibility arising from any reliance placed on the content. Where the content includes any translated material, BMJ does not warrant the accuracy and reliability of the translations (including but not limited to local regulations, clinical guidelines, terminology, drug names and drug dosages), and is not responsible for any error and/or omissions arising from translation and adaptation or otherwise.

### Open access

This is an open access article distributed in accordance with the Creative Commons Attribution Non Commercial (CC BY-NC 4.0) license, which permits others to distribute, remix, adapt, build upon this work non-commercially, and license their derivative works on different terms, provided the original work is properly cited, appropriate credit is given, any changes made indicated, and the use is non-commercial. See: <http://creativecommons.org/licenses/by-nc/4.0/>.

### ORCID iDs

Elä Ziegler <https://orcid.org/0000-0002-2847-8087>

Nicole Usko <https://orcid.org/0009-0004-0000-7699>

Christopher Kofahl <https://orcid.org/0000-0002-0503-3077>

### REFERENCES

1. Grady PA, Gough LL. Self-management: a comprehensive approach to management of chronic conditions. *Am J Public Health*. 2014;104(8):e25-e31.
2. Gerdes N, Zwingmann C, Jäckel WH. The system of rehabilitation in Germany. In: Jäckel WH, Bengel J, Herdt J, eds. *Research in Rehabilitation. Results from a research network in Southwest Germany*. Schattauer; 2006:3-19.
3. Deutsche Rentenversicherung Bund. Reha-Bericht 2022. Available online: [https://www.deutsche-rentenversicherung.de/SharedDocs/Downloads/DE/Statistiken-und-Berichte/Berichte/rehabericht\\_2022.html](https://www.deutsche-rentenversicherung.de/SharedDocs/Downloads/DE/Statistiken-und-Berichte/Berichte/rehabericht_2022.html) (accessed 12 August 2023).
4. Werner S, Nickel S, Kofahl C. Was Zahlen nicht erfassen und ausdrücken können - Gegenseitige Unterstützung unter MS-Betroffenen - Ergebnisse aus dem SHILD-Projekt. In: Deutsche Arbeitsgemeinschaft Selbsthilfegruppen e.V. (DAG SHG), ed. *Selbsthilfegruppenjahrbuch 2018*. Gießen, DAG SHG, 2018:113-123. Available online: <https://www.dag-shg.de/data/Fachpublikationen/2018/DAGSHG-Jahrbuch-2018-Werner-et-al.pdf> (accessed 14 August 2023).
5. Deutsche Rentenversicherung Bund. Selbsthilfegruppen und Verbände. [https://www.deutsche-rentenversicherung.de/DRV/DE/Reha/Was-ist-wenn/selbsthilfegruppen\\_verbaende.html](https://www.deutsche-rentenversicherung.de/DRV/DE/Reha/Was-ist-wenn/selbsthilfegruppen_verbaende.html) (accessed 7 August 2023).
6. Bundesarbeitsgemeinschaft für Rehabilitation. Gemeinsame Empfehlungen zu Förderung der Selbsthilfe. BAG, 2012. [https://www.bag-selbsthilfe.de/fileadmin/user\\_upload/Informationen\\_fuer\\_SELBSTHILFE-AKTIVE/SelbsthilfeFoerderung/Andere/BAR\\_Gemeinsame\\_Empfehlung\\_zu\\_Foerderung\\_der\\_Selbsthilfe.pdf](https://www.bag-selbsthilfe.de/fileadmin/user_upload/Informationen_fuer_SELBSTHILFE-AKTIVE/SelbsthilfeFoerderung/Andere/BAR_Gemeinsame_Empfehlung_zu_Foerderung_der_Selbsthilfe.pdf) (accessed 14 August 2023).

- 1
  - 2
  - 3
  - 4
  - 5
  - 6
  - 7
  - 8
  - 9
  - 10
  - 11
  - 12
  - 13
  - 14
  - 15
  - 16
  - 17
  - 18
  - 19
  - 20
  - 21
  - 22
  - 23
  - 24
  - 25
  - 26
  - 27
  - 28
  - 29
  - 30
  - 31
  - 32
  - 33
  - 34
  - 35
  - 36
  - 37
  - 38
  - 39
  - 40
  - 41
  - 42
  - 43
  - 44
  - 45
  - 46
  - 47
  - 48
  - 49
  - 50
  - 51
  - 52
  - 53
  - 54
  - 55
  - 56
  - 57
  - 58
  - 59
  - 60
7. Kofahl C, Trojan A. Die Patientin und der Patient im Versorgungsgeschehen: Gesundheitsselbsthilfe und Laienpotenzial. In: Schwartz FW, Walter U, Siegrist J, Kolip P, Leidl R, Busse R, Amelung V, Dierks ML, eds. Public Health: Gesundheit und Gesundheitswesen. Elsevier;2022:481-489.
8. Schulz-Nieswandt F, Langenhorst F. Gesundheitsbezogene Selbsthilfe in Deutschland. Zu Genealogie, Gestalt, Gestaltwandel und Wirkkreisen solidarischer gegenseitigkeitshilfegruppen und der Selbsthilfeorganisationen. Berlin, Duncker & Humblot;2015.
9. Nationale Kontakt- und Informationsstelle zur Anregung und Unterstützung von Selbsthilfegruppen (NAKOS). NAKOS Studien. Selbsthilfe Im Überblick 6. Berlin, Germany: NAKOS, 2020:1-60. Available online: <https://www.nakos.de/data/Fachpublikationen/2020/NAKOS-Studien-06-2019.pdf> (accessed 2 August 2023).
10. Kofahl C, Haack M, Nickel S, Dierks ML. Wirkungen der gemeinschaftlichen Selbsthilfe. LIT-Verlag; 2019. Available online: [https://www.uke.de/extern/shild/Materialien\\_Dateien/Kofahl\\_Haack\\_Nickel\\_Dierks\\_2019\\_SHIL\\_D\\_Wirkungen\\_Selbsthilfe\\_digital](https://www.uke.de/extern/shild/Materialien_Dateien/Kofahl_Haack_Nickel_Dierks_2019_SHIL_D_Wirkungen_Selbsthilfe_digital) (accessed 14 August 2023).
11. Ho FY, Chan CS, Lo WY, Leung JC. The effect of self-help cognitive behavioral therapy for insomnia on depressive symptoms: An updated meta-analysis of randomized controlled trials. J Affect Disord. 2020;265:287-304.
12. Ziegler E, Hill J, Lieske B, Klein J, dem OV Knesebeck, Kofahl C. Empowerment in cancer patients: Does peer support make a difference? A systematic review. Psychooncology. 2022;31(5):683-704.
13. Burke E, Pyle M, Machin K, Varese F, Morrison AP. The effects of peer support on empowerment, self-efficacy, and internalized stigma: A narrative synthesis and meta-analysis. Stigma Health. 2019;4(3):337-356.
14. Kofahl C. Gemeinschaftliche Selbsthilfe und Gesundheitskompetenz - der Beitrag der Selbsthilfe zur Gesundheitsbildung des Einzelnen und der Bevölkerung. In: Rathmann K, Dadaczynski K, Okan O, Messer M, eds. Gesundheitskompetenz. Springer;2022:1-12.
15. Kofahl C. Associations of collective self-help activity, health literacy and quality of life in patients with tinnitus. Patient Educ Couns. 2018;101(12):2170-2178.
16. Nickel S, Haack M, von dem Knesebeck O, Dierks ML, Seidel G, Werner S, et al. Teilnahme an Selbsthilfegruppen: Wirkungen auf Selbstmanagement und Wissenserwerb. Bundesgesundheitsbl. 2019;62(1):10-16.
17. Liang D, Jia R, Zhou X, et al. The effectiveness of peer support on self-efficacy and self-management in people with type 2 diabetes: A meta-analysis. Patient Educ Couns. 2021;104(4):760-769.
18. Bottlender M, Soyka M. Prädiktion des Behandlungserfolges 24 Monate nach ambulanter Alkoholentwöhnungstherapie: Die Bedeutung von Selbsthilfegruppen. Fortschr Neurol Psychiatr. 2005;73(3):150-155.
19. Azmiardi A, Murti B, Febrinasari RP, Tamtomo DG. The effect of peer support in diabetes self-management education on glycemic control in patients with type 2 diabetes: a systematic review and meta-analysis. Epidemiol Health. 2021;43:e2021090.
20. Klein M, Borgetto B. Kooperation und Vernetzung von Rehabilitationseinrichtungen und Selbsthilfeinitiativen: Ergebnisse einer Befragung deutscher Rehabilitationseinrichtungen. DRV-Schriften. 2003:41-42.
21. Lindow B, Naumann B, Klosterhuis H. Kontinuität der rehabilitativen Versorgung - Selbsthilfe und Nachsorge nach medizinischer Rehabilitation der Rentenversicherung. In: Deutsche Arbeitsgemeinschaft Selbsthilfegruppen e.V. (DAG SHG), ed. Selbsthilfegruppenjahrbuch 2011. Gießen, DAG SHG, 2011:120-133. Available online: <https://www.dag-shg.de/data/Fachpublikationen/2011/DAGSHG-Jahrbuch-11-Lindow.pdf> (accessed 14 August 2023).

- 1  
2  
3 22. Gerdes N, Bührlen B, Lichtenberg S, Jäckel WH. Rehabilitationsnachsorge – Analyse der  
4 Nachsorgeempfehlungen und ihrer Umsetzung. Roderer; 2005.
- 5 23. Köpke KH. Erfolgreiche Rehabilitation braucht Nachsorge. Auf gutem Wege und dennoch großer  
6 Handlungsbedarf. In: Weber A, eds. Gesundheit – Arbeit – Rehabilitation. Festschrift für Wolfgang  
7 Slesina. Regensburg: Roderer; 2008:71- 90.
- 8 24. Bundesarbeitsgemeinschaft Selbsthilfe von Menschen mit Behinderung, chronischer Erkrankung  
9 und ihren Angehörigen e. V. Handlungsleitfaden für die gesundheitliche Selbsthilfe zur Mitwirkung  
10 von Betroffenen im Rahmen der medizinischen Rehabilitation. BAG, 2015. [https://www.bag-  
11 selbsthilfe.de/informationen-fuer-selbsthilfe-aktive/die-projekte-der-bag-  
12 selbsthilfe/handlungsleitfaden-fuer-die-gesundheitliche-selbsthilfe-zur-mitwirkung-von-  
13 betroffenen-im-rahmen-der-medizinischen-rehabilitation](https://www.bag-selbsthilfe.de/informationen-fuer-selbsthilfe-aktive/die-projekte-der-bag-selbsthilfe/handlungsleitfaden-fuer-die-gesundheitliche-selbsthilfe-zur-mitwirkung-von-betroffenen-im-rahmen-der-medizinischen-rehabilitation) (accessed 14 August 2023).
- 14 25. Nationale Kontakt- und Informationsstelle zur Anregung und Unterstützung von  
15 Selbsthilfegruppen (NAKOS). NAKOS-EXTRA 34. Kooperation von Selbsthilfekontaktstellen und  
16 Rehabilitationskliniken. Berlin; 2003:1-79.
- 17 26. Trojan A, Bellwinkel M, Bobzien M, Nickel S. Selbsthilfefreundlichkeit Im Gesundheitswesen Wie  
18 Sich Selbsthilfebezogene Patientenorientierung Systematisch Entwickeln Und Verankern Lässt.  
19 Bremerhaven Wirtschaftsverl. Nw, Verl. Für Neue Wiss; 2012.
- 20 27. Haenel J, Wittmar S, Wuensche I, Borgetto B. Deutschlandweite Befragung zur Vernetzung und  
21 Kooperation von Rehabilitation und Selbsthilfe (VERS 2.0): Ein Überblick über Meinungen,  
22 Kontakte und Kooperationen von Rehabilitationseinrichtungen in Bezug auf Selbsthilfe.  
23 Rehabilitation. 2023;62:13-21.
- 24 28. Kofahl C, Trojan A, von dem Knesebeck O, Nickel S. Self-help friendliness: A German approach for  
25 strengthening the cooperation between self-help groups and health care professionals. Soc Sci  
26 Med. 2014;123:217-225.
- 27 29. Nickel S, Trojan A, Kofahl C. Involving self-help groups in health-care institutions: the patients'  
28 contribution to and their view of "self-help friendliness" as an approach to implement quality  
29 criteria of sustainable co-operation. Health Expect. 2017;20(2):274-287.
- 30 30. Nationale Kontakt- und Informationsstelle zur Anregung und Unterstützung von  
31 Selbsthilfegruppen (NAKOS). NAKOS-EXTRA 39. Integration von Selbsthilfefreundlichkeit als  
32 Qualitätsmerkmal in Qualitätsmanagement-Systemen und -strukturen im Gesundheitswesen.  
33 Berlin; 2018:6-123.
- 34 31. Selbsthilfefreundlichkeit und Patientenorientierung im Gesundheitswesen.  
35 <https://www.selbsthilfefreundlichkeit.de/uber-uns/> (accessed 2 August 2023).
- 36 32. Trojan A. Selbsthilfegruppen als Akteure für mehr Kooperation und Integration. In: Brandhorst A,  
37 Hildebrandt H, Luthe EW, eds. Kooperation und Integration. Das unvollendete Projekt des  
38 Gesundheitswesens. Springer; 2017:167-189.
- 39 33. Bobzien M, Trojan A. „Selbsthilfefreundlichkeit“ als Element patientenorientierter Rehabilitation  
40 – Ergebnisse eines Modellversuchs. Rehabilitation. 2015;54:116-122.
- 41 34. Bundesarbeitsgemeinschaft Selbsthilfe von Menschen mit Behinderung, chronischer Erkrankung  
42 und ihren Angehörigen e.V. Strategiepapier: Selbsthilfe und Rehabilitation. BAG, 2018.  
43 [https://www.bag-selbsthilfe.de/informationen-fuer-selbsthilfe-  
44 aktive/projekte/SH\\_der\\_Zukunft/Strategiepapier\\_Selbsthilfe\\_und\\_Rehabilitation.docx](https://www.bag-selbsthilfe.de/informationen-fuer-selbsthilfe-aktive/projekte/SH_der_Zukunft/Strategiepapier_Selbsthilfe_und_Rehabilitation.docx) (accessed  
45 14 August 2023).
- 46 35. Creswell JW, Plano Clark VL. Designing and Conducting Mixed Methods Research. SAGE; 2017.
- 47 36. Creswell JW, Creswell JD. Mixed methods procedures. In: Research design: Qualitative,  
48 quantitative, and mixed methods approaches. SAGE; 2018:213-246.
- 49 37. Wright MT. Partizipative Gesundheitsforschung: Ursprünge und heutiger Stand.  
50 Bundesgesundheitsbl. 2021;64:140-145.
- 51  
52  
53  
54  
55  
56  
57  
58  
59  
60

38. Flick U. An Introduction to Qualitative Research. SAGE; 2023.
39. Helfferich C. Die Qualität qualitativer Daten. Springer-Verlag; 2011.
40. Kuckartz U. Qualitative Inhaltsanalyse: Methoden, Praxis, Computerunterstützung. Beltz Juventa; 2012.
41. Dresing T, Pehl T. Praxisbuch Transkription. Regelsysteme, Software und praktische Anleitungen für qualitative ForscherInnen. Marburg; 2018.
42. Braun V, Clarke V. Thematic Analysis. SAGE; 2006:77-101.
43. Rehakliniken in Deutschland 2023. Available online: <https://www.rehakliniken.de/rehakliniken/kliniksuche> (accessed 10 October 2023).
44. Körner M. Interprofessional teamwork in medical rehabilitation: a comparison of multidisciplinary and interdisciplinary team approach. Clin Rehabil. 2010;24(8):745-755.
45. Körner M, Luzay L, Plewnia A, Becker S, Rundel M, Zimmermann L, Müller C. A cluster-randomized controlled study to evaluate a team coaching concept for improving teamwork and patient-centeredness in rehabilitation teams. PloS one. 2017;12(7): e0180171.
46. Schubert M, Kämpf D, Wahl M, Hofmann S, Girbig M et al. MRSA point prevalence among health care workers in German rehabilitation centers: a multi-center, cross-sectional study in a non-outbreak setting. Int J Environ Res Public Health. 2019;16(9):1660.
47. Ziegler E, Nickel S, Trojan A, Klein J, Kofahl C. Self-help friendliness in cancer care: A cross-sectional study among self-help group leaders in Germany. Health Expect. 2022;25(6):3005-3016.
48. Trojan A, Nickel S, Kofahl C. Implementing 'self-help friendliness' in German hospitals: a longitudinal study. Health Promot Int. 2016;31(2):303-313.
49. Östlund U, Kidd L, Wengström Y, et al. Combining qualitative and quantitative research within mixed method research designs: A methodological review. Int J Nurs Stud 2011;48:369–83.

### Figure 1 Research flow

Abbreviations: *WS* Workshop, *SHG* Self-Help Groups, *SHO* Self-Help Organisations, *SHC* Self-Help Clearinghouses.

### Supplementary materials

Quality criteria for self-help friendly rehabilitation clinics

Interview guide for rehabilitation clinics



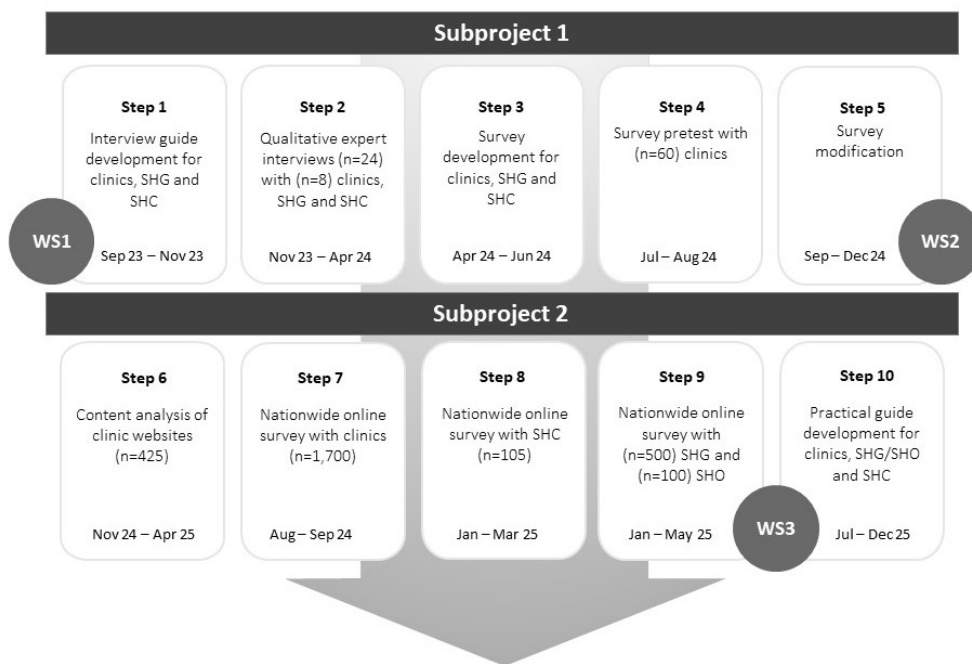

Figure 1 Research flow  
 Abbreviations: WS Workshop, SHG Self-Help Groups, SHO Self-Help Organisations, SHC Self-Help Clearinghouses

244x167mm (96 x 96 DPI)

## SUPPLEMENTARY INFORMATION

### Quality criteria for self-help friendly rehabilitation clinics

Five quality criteria for self-help friendliness have been developed through mutual agreement between clinic representatives and self-help organisations, specifically tailored to the particular needs of rehabilitation clinics and their patients. They reflect the most important aspects of self-help friendliness and provide guidance on how cooperation between rehabilitation clinics and self-help groups or organisations can be organised in concrete terms.

#### 1. Self-presentation is made possible

*The rehabilitation centre informs patients and their relatives at central locations in its facility, in its rooms and its media about the importance of self-help in rehabilitation and about its cooperation with indication-related self-help groups and organisations.*

#### 2. The possibility of participation is pointed out

*During the rehabilitation programme, patients and their relatives are regularly and personally informed about the possibility of participating in a self-help group that is suitable for them.*

#### 3. A contact person is appointed

*The rehabilitation facility appoints a contact person for self-help affairs and makes this person known to patients and staff.*

#### 4. Training is provided on the subject of self-help

*Employees of the rehabilitation facility are informed about self-help in general and concerning the most common conditions that occur in the facility.*

#### 5. Cooperation is reliably organised

*Rehabilitation facility and self-help make specific agreements on cooperation and regular exchange.*

## SUPPLEMENTARY INFORMATION

### Interview guide for rehabilitation clinics

#### a) Introduction/Introductory questions

- Thanks for agreement to participate
- Brief summary of the project/goals/team
- Importance of the interview for the exploration of the cooperation process and the development of a standardised questionnaire
- Goal: Exchange of experiences regarding cooperation work, there is no right/wrong (experiences, wishes, needs)
- Consent to audio recording / recording of interview
- Anonymity or visibility in reports desired? Assure confidentiality
- Introduction: How long have you been active as self-help representative/contact person in the rehabilitation clinic? Was there a self-help representative before your employment in this position?
- Would you please briefly describe your responsibilities? Do you receive additional compensation or other benefits for this position?
- Which patients do you usually deal with (briefly)?

#### b) Questions about the importance of SH

- In your opinion as representative in a rehabilitation clinic, what is the importance of self-help for patients in rehabilitation clinics?

#### c) Main part/questions on cooperation

##### 1. Development of cooperation

- Which self-help actors (SHG/SHO/SHC) are you in contact with?
- Could you describe how your cooperation with the self-help actors (SHG/SHO/SHC) we are interviewing as well came about?  
*Since when? Who took the initiative/established contact? With what goal/expectations/motivation), On what basis? (Framework conditions: legal requirements, guidelines, provider structures), To what extent?*

##### 2. Organisation of Cooperation

- In what form does your rehabilitation clinic cooperate with these self-help actors and, if applicable, a SHC?
- What are the main goals of the cooperation?
- What self-help services do you offer at the rehabilitation clinic? Who offers them? Where do the services take place? Who exactly are the services aimed at? How are they accepted?
- With regard to the cooperation between SH and rehabilitation clinics, the concept of self-help friendliness (SHF) is a central topic. The concept contains five quality criteria for SHF. Do you know these criteria and are they implemented in your rehabilitation clinic?

**Name five quality criteria for SHF. Please indicate to what extent the statements apply to your cooperating rehabilitation clinic.**

- If you had to make a spontaneous assessment, to what extent is criteria x implemented?
- By whom and with which measures is criteria x implemented?

- Which (supportive and obstructive) factors play a role in the implementation of the criteria? (after asking about the five criteria)
- Are the measures for implementing the criteria regularly discussed in a quality circle or team meeting?
- Do you find the five criteria sufficient? If you had a free choice and could add criteria, which ones would you add?

*Implementation of the cooperation, SHF quality criteria (additional: public relations intensity, website information, display of information material, provision of rooms, exchange of experiences, participation in quality circles, further training opportunities, participation), importance of the cooperation, integration into QM (what, how, where, when, how often, with whom, by whom)*

- Are patients referred to SHG by your rehabilitation clinic? If yes, through which access routes?
- How could the motivation of rehabilitation patients to join an SHG be increased? What influence do they have?
  - Certain actors from the self-help and rehabilitation sector (e.g. self-help representatives of the rehabilitation clinic, local self-help clearinghouses, SPiG network)
  - Framework conditions (in particular contracts/agreements) on the success of cooperation with the rehabilitation clinic?

*Health policy guidelines by federal/state ministries, organisational structures, contracts, role/responsibilities of SH and rehabilitation providers/associations, sponsors, certification pressure) Resources (personnel: Are there SHRs? Activities, areas of responsibility, time, space, financial), systems (guidelines for action, QM integration, etc.), digital services*

### **3. Evaluation/Assessment of the Cooperation process**

- How would you rate the overall quality of the cooperation (school grades)?  
*In addition: Regular evaluations, effectiveness (successful mediation, acceptance, motivation, actual use), importance for rehabilitants + subjective benefits, sustainability of cooperation, digital offers*

### **4. Needs**

- What would you like to see to improve cooperation with rehabilitation clinics and SHC?
- Do you have any wishes regarding your cooperation with certain actors in the self-help, rehabilitation or health care sectors as a whole and in particular with the SPiG network?

*Structures/framework conditions, resources (personnel/time/space, acquisitions), SHG presence + offer, external presentation of the SHR, plans and wishes (own and rehabilitation clinics + possibly SHC, e.g. financial compensation etc.), communication between the actors, digital offers, outlook*

#### **d) Final questions and information**

- Is there anything else you would like to tell me about your work as a representative?
- Are there any relevant points that remained open during the interview?
- Information about the project and ways to contact us
- Reference to homepage and next steps (evaluation, results for the questionnaire)
- Thanks
