# Supplementary material for: Self-help friendliness and cooperation with self-help groups among rehabilitation clinics in Germany (KoReS): a mixed-methods study protocol
Source: PubMed Central journal article supplement — BMJ Open. 2024 Mar 20;14(3):e083489. doi: 10.1136/bmjopen-2023-083489 (PMC10961549; doi:10.1136/bmjopen-2023-083489), 2024-03-20
Supplement: bmjopen-2023-083489supp001.pdf [file bmjopen-2023-083489supp001.pdf]

## SUPPLEMENTARY INFORMATION

### Quality criteria for self-help friendly rehabilitation clinics

Five quality criteria for self-help friendliness have been developed through mutual agreement between clinic representatives and self-help organisations, specifically tailored to the particular needs of rehabilitation clinics and their patients. They reflect the most important aspects of self-help friendliness and provide guidance on how cooperation between rehabilitation clinics and self-help groups or organisations can be organised in concrete terms.

1. Self-presentation is made possible

*The rehabilitation centre informs patients and their relatives at central locations in its facility, in its rooms and its media about the importance of self-help in rehabilitation and about its cooperation with indication-related self-help groups and organisations.*

2. The possibility of participation is pointed out

*During the rehabilitation programme, patients and their relatives are regularly and personally informed about the possibility of participating in a self-help group that is suitable for them.*

3. A contact person is appointed

*The rehabilitation facility appoints a contact person for self-help affairs and makes this person known to patients and staff.*

4. Training is provided on the subject of self-help

*Employees of the rehabilitation facility are informed about self-help in general and concerning the most common conditions that occur in the facility.*

5. Cooperation is reliably organised

*Rehabilitation facility and self-help make specific agreements on cooperation and regular exchange.*
